# Supplementary material for: Effect of disinfectant residual, pH, and temperature on microbial abundance in disinfected drinking water distribution systems
Source: Royal Society of Chemistry journal article supplement (doi:10.1039/d0ew00809e), 2020-11-10
Supplement: d0ew00809e1.csv [file d0ew00809e1.csv]

sample_date	sampler_name	project_type	broad_location	total_Cl2_mg.L	free_Cl2_mg.L	site	water_age_h
1/3/18	DWDS_F	Full_Scale	DWDS_F	0.94	0.76	site_24	289.38
4/18/18	DWDS_F	Full_Scale	DWDS_F	1.41	1.12	site_24	289.38
8/1/17	DWDS_F	Full_Scale	DWDS_F	1.59	NA	site_11	52.5
8/1/17	DWDS_F	Full_Scale	DWDS_F	1.28	NA	site_8	34.97
8/1/17	DWDS_F	Full_Scale	DWDS_F	3.1	NA	site_14	70
8/1/17	DWDS_F	Full_Scale	DWDS_F	1.16	NA	site_9	50.07
8/1/17	DWDS_F	Full_Scale	DWDS_F	1.82	NA	site_12	56.88
3/20/18	DWDS_F	Full_Scale	DWDS_F	0.39	NA	site_15	70
8/1/17	DWDS_F	Full_Scale	DWDS_F	1.55	NA	site_10	50.61
8/1/17	DWDS_F	Full_Scale	DWDS_F	3	NA	site_17	70
8/1/17	DWDS_F	Full_Scale	DWDS_F	1.9	NA	site_13	64.36
8/1/17	DWDS_F	Full_Scale	DWDS_F	1.89	NA	site_1	19.35
8/1/17	DWDS_F	Full_Scale	DWDS_F	0.19	NA	site_7	34.69
8/1/17	DWDS_F	Full_Scale	DWDS_F	1.65	NA	site_6	34.06
8/2/17	DWDS_F	Full_Scale	DWDS_F	1.72	NA	site_19	131.08
8/2/17	DWDS_F	Full_Scale	DWDS_F	1.78	NA	site_5	28.98
8/2/17	DWDS_F	Full_Scale	DWDS_F	1.4	NA	site_18	78.9
8/2/17	DWDS_F	Full_Scale	DWDS_F	1.06	NA	site_22	206.3
8/2/17	DWDS_F	Full_Scale	DWDS_F	1.02	NA	site_23	234.39
8/2/17	DWDS_F	Full_Scale	DWDS_F	0.8	NA	site_24	289.38
8/2/17	DWDS_F	Full_Scale	DWDS_F	0.83	NA	site_21	192.61
8/2/17	DWDS_F	Full_Scale	DWDS_F	1.53	NA	site_20	163.92
8/2/17	DWDS_F	Full_Scale	DWDS_F	2.04	NA	site_3	23.31
8/8/17	DWDS_F	Full_Scale	DWDS_F	1.79	NA	site_11	52.5
8/8/17	DWDS_F	Full_Scale	DWDS_F	1.22	NA	site_8	34.97
8/8/17	DWDS_F	Full_Scale	DWDS_F	2.8	NA	site_14	70
8/8/17	DWDS_F	Full_Scale	DWDS_F	1.05	NA	site_9	50.07
8/8/17	DWDS_F	Full_Scale	DWDS_F	1.27	NA	site_12	56.88
3/13/18	DWDS_F	Full_Scale	DWDS_F	0.44	NA	site_15	70
8/8/17	DWDS_F	Full_Scale	DWDS_F	1.77	NA	site_10	50.61
8/8/17	DWDS_F	Full_Scale	DWDS_F	2.8	NA	site_17	70
8/8/17	DWDS_F	Full_Scale	DWDS_F	1.7	NA	site_13	64.36
8/8/17	DWDS_F	Full_Scale	DWDS_F	2.01	NA	site_1	19.35
8/8/17	DWDS_F	Full_Scale	DWDS_F	0.12	NA	site_7	34.69
8/8/17	DWDS_F	Full_Scale	DWDS_F	1.91	NA	site_6	34.06
8/9/17	DWDS_F	Full_Scale	DWDS_F	1.34	NA	site_19	131.08
8/9/17	DWDS_F	Full_Scale	DWDS_F	1.74	NA	site_5	28.98
8/9/17	DWDS_F	Full_Scale	DWDS_F	3.1	NA	site_14	70
8/9/17	DWDS_F	Full_Scale	DWDS_F	2.3	NA	site_18	78.9
8/9/17	DWDS_F	Full_Scale	DWDS_F	1.01	NA	site_22	206.3
8/9/17	DWDS_F	Full_Scale	DWDS_F	1.48	NA	site_23	234.39
8/9/17	DWDS_F	Full_Scale	DWDS_F	1.47	NA	site_24	289.38
8/9/17	DWDS_F	Full_Scale	DWDS_F	1.5	NA	site_21	192.61
8/9/17	DWDS_F	Full_Scale	DWDS_F	0.7	NA	site_20	163.92
8/9/17	DWDS_F	Full_Scale	DWDS_F	2.09	NA	site_3	23.31
8/15/17	DWDS_F	Full_Scale	DWDS_F	1.79	NA	site_1	19.35
8/15/17	DWDS_F	Full_Scale	DWDS_F	1.69	NA	site_11	52.5
8/15/17	DWDS_F	Full_Scale	DWDS_F	1.28	NA	site_8	34.97
8/15/17	DWDS_F	Full_Scale	DWDS_F	3.3	NA	site_14	70
8/15/17	DWDS_F	Full_Scale	DWDS_F	1.28	NA	site_9	50.07
8/15/17	DWDS_F	Full_Scale	DWDS_F	1.23	NA	site_12	56.88
1/16/18	DWDS_F	Full_Scale	DWDS_F	0.57	NA	site_15	70
8/15/17	DWDS_F	Full_Scale	DWDS_F	1.61	NA	site_10	50.61
8/15/17	DWDS_F	Full_Scale	DWDS_F	3.2	NA	site_17	70
8/15/17	DWDS_F	Full_Scale	DWDS_F	1.53	NA	site_13	64.36
8/15/17	DWDS_F	Full_Scale	DWDS_F	0.12	NA	site_7	34.69
8/15/17	DWDS_F	Full_Scale	DWDS_F	1.77	NA	site_6	34.06
8/16/17	DWDS_F	Full_Scale	DWDS_F	2.5	NA	site_19	131.08
8/16/17	DWDS_F	Full_Scale	DWDS_F	1.27	NA	site_5	28.98
8/16/17	DWDS_F	Full_Scale	DWDS_F	2.5	NA	site_18	78.9
8/16/17	DWDS_F	Full_Scale	DWDS_F	0.44	NA	site_22	206.3
8/16/17	DWDS_F	Full_Scale	DWDS_F	1.82	NA	site_23	234.39
8/16/17	DWDS_F	Full_Scale	DWDS_F	1.39	NA	site_24	289.38
8/16/17	DWDS_F	Full_Scale	DWDS_F	1.52	NA	site_21	192.61
8/16/17	DWDS_F	Full_Scale	DWDS_F	0.63	NA	site_20	163.92
8/16/17	DWDS_F	Full_Scale	DWDS_F	2.6	NA	site_3	23.31
8/22/17	DWDS_F	Full_Scale	DWDS_F	1.7	NA	site_1	19.35
8/22/17	DWDS_F	Full_Scale	DWDS_F	1.57	NA	site_11	52.5
8/22/17	DWDS_F	Full_Scale	DWDS_F	1.13	NA	site_8	34.97
8/22/17	DWDS_F	Full_Scale	DWDS_F	2.7	NA	site_14	70
8/22/17	DWDS_F	Full_Scale	DWDS_F	1.35	NA	site_9	50.07
8/22/17	DWDS_F	Full_Scale	DWDS_F	1.78	NA	site_12	56.88
1/23/18	DWDS_F	Full_Scale	DWDS_F	0.61	NA	site_15	70
8/22/17	DWDS_F	Full_Scale	DWDS_F	1.61	NA	site_10	50.61
8/22/17	DWDS_F	Full_Scale	DWDS_F	2.7	NA	site_17	70
8/22/17	DWDS_F	Full_Scale	DWDS_F	1.14	NA	site_13	64.36
8/22/17	DWDS_F	Full_Scale	DWDS_F	0.16	NA	site_7	34.69
8/22/17	DWDS_F	Full_Scale	DWDS_F	1.79	NA	site_6	34.06
8/23/17	DWDS_F	Full_Scale	DWDS_F	1.63	NA	site_19	131.08
8/23/17	DWDS_F	Full_Scale	DWDS_F	0.4	NA	site_5	28.98
8/23/17	DWDS_F	Full_Scale	DWDS_F	1.7	NA	site_18	78.9
8/23/17	DWDS_F	Full_Scale	DWDS_F	0.16	NA	site_22	206.3
8/23/17	DWDS_F	Full_Scale	DWDS_F	0.36	NA	site_23	234.39
8/23/17	DWDS_F	Full_Scale	DWDS_F	0.39	NA	site_24	289.38
8/23/17	DWDS_F	Full_Scale	DWDS_F	0.43	NA	site_21	192.61
8/23/17	DWDS_F	Full_Scale	DWDS_F	1.25	NA	site_20	163.92
8/23/17	DWDS_F	Full_Scale	DWDS_F	1.88	NA	site_3	23.31
8/28/17	DWDS_F	Full_Scale	DWDS_F	NA	NA	site_13	64.36
8/29/17	DWDS_F	Full_Scale	DWDS_F	1.62	NA	site_1	19.35
8/29/17	DWDS_F	Full_Scale	DWDS_F	1.43	NA	site_11	52.5
8/29/17	DWDS_F	Full_Scale	DWDS_F	1.07	NA	site_8	34.97
8/29/17	DWDS_F	Full_Scale	DWDS_F	2.9	NA	site_14	70
8/29/17	DWDS_F	Full_Scale	DWDS_F	1.36	NA	site_9	50.07
8/29/17	DWDS_F	Full_Scale	DWDS_F	1.1	NA	site_12	56.88
3/27/18	DWDS_F	Full_Scale	DWDS_F	0.67	NA	site_15	70
8/29/17	DWDS_F	Full_Scale	DWDS_F	1.4	NA	site_10	50.61
8/29/17	DWDS_F	Full_Scale	DWDS_F	2.9	NA	site_17	70
8/29/17	DWDS_F	Full_Scale	DWDS_F	1.15	NA	site_13	64.36
8/29/17	DWDS_F	Full_Scale	DWDS_F	0.13	NA	site_7	34.69
8/29/17	DWDS_F	Full_Scale	DWDS_F	1.59	NA	site_6	34.06
8/30/17	DWDS_F	Full_Scale	DWDS_F	1.44	NA	site_19	131.08
8/30/17	DWDS_F	Full_Scale	DWDS_F	1.45	NA	site_5	28.98
8/30/17	DWDS_F	Full_Scale	DWDS_F	1.34	NA	site_18	78.9
8/30/17	DWDS_F	Full_Scale	DWDS_F	1.3	NA	site_22	206.3
8/30/17	DWDS_F	Full_Scale	DWDS_F	1.38	NA	site_23	234.39
8/30/17	DWDS_F	Full_Scale	DWDS_F	1.09	NA	site_24	289.38
8/30/17	DWDS_F	Full_Scale	DWDS_F	1.43	NA	site_21	192.61
8/30/17	DWDS_F	Full_Scale	DWDS_F	1.31	NA	site_20	163.92
8/30/17	DWDS_F	Full_Scale	DWDS_F	1.74	NA	site_3	23.31
1/2/18	DWDS_F	Full_Scale	DWDS_F	1.89	NA	site_1	19.35
1/2/18	DWDS_F	Full_Scale	DWDS_F	0.49	NA	site_7	34.69
1/2/18	DWDS_F	Full_Scale	DWDS_F	2.26	NA	site_6	34.06
1/2/18	DWDS_F	Full_Scale	DWDS_F	2.17	NA	site_11	52.5
1/2/18	DWDS_F	Full_Scale	DWDS_F	2.03	NA	site_8	34.97
1/2/18	DWDS_F	Full_Scale	DWDS_F	1.59	NA	site_14	70
1/2/18	DWDS_F	Full_Scale	DWDS_F	1.35	NA	site_9	50.07
1/2/18	DWDS_F	Full_Scale	DWDS_F	2.19	NA	site_12	56.88
1/9/18	DWDS_F	Full_Scale	DWDS_F	0.92	NA	site_15	70
1/2/18	DWDS_F	Full_Scale	DWDS_F	2.08	NA	site_10	50.61
1/2/18	DWDS_F	Full_Scale	DWDS_F	1.57	NA	site_17	70
1/2/18	DWDS_F	Full_Scale	DWDS_F	2.17	NA	site_13	64.36
1/3/18	DWDS_F	Full_Scale	DWDS_F	1.85	NA	site_19	131.08
1/3/18	DWDS_F	Full_Scale	DWDS_F	1.93	NA	site_5	28.98
1/3/18	DWDS_F	Full_Scale	DWDS_F	1.94	NA	site_18	78.9
1/3/18	DWDS_F	Full_Scale	DWDS_F	1.78	NA	site_22	206.3
1/3/18	DWDS_F	Full_Scale	DWDS_F	1.16	NA	site_23	234.39
1/3/18	DWDS_F	Full_Scale	DWDS_F	1.98	NA	site_21	192.61
1/3/18	DWDS_F	Full_Scale	DWDS_F	2.09	NA	site_20	163.92
1/3/18	DWDS_F	Full_Scale	DWDS_F	2.6	NA	site_3	23.31
1/4/18	DWDS_F	Full_Scale	DWDS_F	NA	NA	site_24	289.38
1/5/18	DWDS_F	Full_Scale	DWDS_F	1.42	NA	site_14	70
1/9/18	DWDS_F	Full_Scale	DWDS_F	2.09	NA	site_1	19.35
1/9/18	DWDS_F	Full_Scale	DWDS_F	0.21	NA	site_7	34.69
1/9/18	DWDS_F	Full_Scale	DWDS_F	2.2	NA	site_6	34.06
1/9/18	DWDS_F	Full_Scale	DWDS_F	2.04	NA	site_11	52.5
1/9/18	DWDS_F	Full_Scale	DWDS_F	1.97	NA	site_8	34.97
1/9/18	DWDS_F	Full_Scale	DWDS_F	1.01	NA	site_14	70
1/9/18	DWDS_F	Full_Scale	DWDS_F	0.55	NA	site_9	50.07
1/9/18	DWDS_F	Full_Scale	DWDS_F	2.01	NA	site_12	56.88
3/6/18	DWDS_F	Full_Scale	DWDS_F	0.97	NA	site_15	70
1/9/18	DWDS_F	Full_Scale	DWDS_F	1.99	NA	site_10	50.61
1/9/18	DWDS_F	Full_Scale	DWDS_F	0.97	NA	site_17	70
1/9/18	DWDS_F	Full_Scale	DWDS_F	1.96	NA	site_13	64.36
1/10/18	DWDS_F	Full_Scale	DWDS_F	1.82	NA	site_19	131.08
1/10/18	DWDS_F	Full_Scale	DWDS_F	1.37	NA	site_5	28.98
1/10/18	DWDS_F	Full_Scale	DWDS_F	2.3	NA	site_18	78.9
1/10/18	DWDS_F	Full_Scale	DWDS_F	1.54	NA	site_22	206.3
1/10/18	DWDS_F	Full_Scale	DWDS_F	0.78	NA	site_23	234.39
1/10/18	DWDS_F	Full_Scale	DWDS_F	0.73	NA	site_24	289.38
1/10/18	DWDS_F	Full_Scale	DWDS_F	1.32	NA	site_21	192.61
1/10/18	DWDS_F	Full_Scale	DWDS_F	1.95	NA	site_20	163.92
1/10/18	DWDS_F	Full_Scale	DWDS_F	2.14	NA	site_3	23.31
1/11/18	DWDS_F	Full_Scale	DWDS_F	NA	NA	site_1	19.35
1/11/18	DWDS_F	Full_Scale	DWDS_F	0.41	NA	site_9	50.07
1/15/18	DWDS_F	Full_Scale	DWDS_F	NA	NA	site_13	64.36
1/16/18	DWDS_F	Full_Scale	DWDS_F	2.05	NA	site_1	19.35
1/16/18	DWDS_F	Full_Scale	DWDS_F	0.2	NA	site_7	34.69
1/16/18	DWDS_F	Full_Scale	DWDS_F	2.13	NA	site_6	34.06
1/16/18	DWDS_F	Full_Scale	DWDS_F	1.89	NA	site_11	52.5
1/16/18	DWDS_F	Full_Scale	DWDS_F	1.92	NA	site_8	34.97
1/16/18	DWDS_F	Full_Scale	DWDS_F	0.73	NA	site_14	70
1/16/18	DWDS_F	Full_Scale	DWDS_F	0.43	NA	site_9	50.07
1/16/18	DWDS_F	Full_Scale	DWDS_F	2.01	NA	site_12	56.88
2/27/18	DWDS_F	Full_Scale	DWDS_F	1.05	NA	site_15	70
1/16/18	DWDS_F	Full_Scale	DWDS_F	1.91	NA	site_10	50.61
1/16/18	DWDS_F	Full_Scale	DWDS_F	0.71	NA	site_17	70
1/16/18	DWDS_F	Full_Scale	DWDS_F	1.61	NA	site_13	64.36
1/17/18	DWDS_F	Full_Scale	DWDS_F	1.84	NA	site_19	131.08
1/17/18	DWDS_F	Full_Scale	DWDS_F	1.73	NA	site_5	28.98
1/17/18	DWDS_F	Full_Scale	DWDS_F	2.3	NA	site_18	78.9
1/17/18	DWDS_F	Full_Scale	DWDS_F	2.08	NA	site_22	206.3
1/17/18	DWDS_F	Full_Scale	DWDS_F	0.41	NA	site_23	234.39
1/17/18	DWDS_F	Full_Scale	DWDS_F	0.49	NA	site_24	289.38
1/17/18	DWDS_F	Full_Scale	DWDS_F	0.51	NA	site_21	192.61
1/17/18	DWDS_F	Full_Scale	DWDS_F	2.09	NA	site_20	163.92
1/17/18	DWDS_F	Full_Scale	DWDS_F	2.13	NA	site_3	23.31
1/23/18	DWDS_F	Full_Scale	DWDS_F	2.08	NA	site_1	19.35
1/23/18	DWDS_F	Full_Scale	DWDS_F	0.29	NA	site_7	34.69
1/23/18	DWDS_F	Full_Scale	DWDS_F	2.3	NA	site_6	34.06
1/23/18	DWDS_F	Full_Scale	DWDS_F	2.01	NA	site_11	52.5
1/23/18	DWDS_F	Full_Scale	DWDS_F	2.08	NA	site_8	34.97
1/23/18	DWDS_F	Full_Scale	DWDS_F	1.81	NA	site_14	70
1/23/18	DWDS_F	Full_Scale	DWDS_F	0.38	NA	site_9	50.07
1/23/18	DWDS_F	Full_Scale	DWDS_F	1.99	NA	site_12	56.88
8/29/17	DWDS_F	Full_Scale	DWDS_F	1.07	NA	site_15	70
1/23/18	DWDS_F	Full_Scale	DWDS_F	2.09	NA	site_10	50.61
1/23/18	DWDS_F	Full_Scale	DWDS_F	1.79	NA	site_17	70
1/23/18	DWDS_F	Full_Scale	DWDS_F	2.02	NA	site_13	64.36
1/24/18	DWDS_F	Full_Scale	DWDS_F	1.94	NA	site_19	131.08
1/24/18	DWDS_F	Full_Scale	DWDS_F	1.58	NA	site_5	28.98
1/24/18	DWDS_F	Full_Scale	DWDS_F	2.4	NA	site_18	78.9
1/24/18	DWDS_F	Full_Scale	DWDS_F	1.91	NA	site_22	206.3
1/24/18	DWDS_F	Full_Scale	DWDS_F	0.56	NA	site_23	234.39
1/24/18	DWDS_F	Full_Scale	DWDS_F	0.26	NA	site_24	289.38
1/24/18	DWDS_F	Full_Scale	DWDS_F	0.84	NA	site_21	192.61
1/24/18	DWDS_F	Full_Scale	DWDS_F	1.84	NA	site_20	163.92
1/24/18	DWDS_F	Full_Scale	DWDS_F	2.6	NA	site_3	23.31
1/30/18	DWDS_F	Full_Scale	DWDS_F	2.19	NA	site_1	19.35
1/30/18	DWDS_F	Full_Scale	DWDS_F	0.42	NA	site_7	34.69
1/30/18	DWDS_F	Full_Scale	DWDS_F	2.3	NA	site_11	52.5
1/30/18	DWDS_F	Full_Scale	DWDS_F	2.2	NA	site_8	34.97
1/30/18	DWDS_F	Full_Scale	DWDS_F	1.37	NA	site_14	70
1/30/18	DWDS_F	Full_Scale	DWDS_F	1.01	NA	site_9	50.07
1/30/18	DWDS_F	Full_Scale	DWDS_F	2.15	NA	site_12	56.88
1/30/18	DWDS_F	Full_Scale	DWDS_F	1.21	NA	site_15	70
1/30/18	DWDS_F	Full_Scale	DWDS_F	2.3	NA	site_10	50.61
1/30/18	DWDS_F	Full_Scale	DWDS_F	1.31	NA	site_17	70
1/30/18	DWDS_F	Full_Scale	DWDS_F	2	NA	site_13	64.36
1/30/18	DWDS_F	Full_Scale	DWDS_F	2.3	NA	site_6	34.06
1/31/18	DWDS_F	Full_Scale	DWDS_F	2.3	NA	site_19	131.08
1/31/18	DWDS_F	Full_Scale	DWDS_F	1.85	NA	site_5	28.98
1/31/18	DWDS_F	Full_Scale	DWDS_F	2.5	NA	site_18	78.9
1/31/18	DWDS_F	Full_Scale	DWDS_F	2.4	NA	site_22	206.3
1/31/18	DWDS_F	Full_Scale	DWDS_F	0.96	NA	site_23	234.39
1/31/18	DWDS_F	Full_Scale	DWDS_F	0.51	NA	site_24	289.38
1/31/18	DWDS_F	Full_Scale	DWDS_F	0.43	NA	site_21	192.61
1/31/18	DWDS_F	Full_Scale	DWDS_F	2.01	NA	site_20	163.92
1/31/18	DWDS_F	Full_Scale	DWDS_F	2.5	NA	site_3	23.31
2/2/18	DWDS_F	Full_Scale	DWDS_F	1.74	NA	site_14	70
2/5/18	DWDS_F	Full_Scale	DWDS_F	NA	NA	site_24	289.38
2/6/18	DWDS_F	Full_Scale	DWDS_F	2.13	NA	site_1	19.35
2/6/18	DWDS_F	Full_Scale	DWDS_F	0.41	NA	site_7	34.69
2/6/18	DWDS_F	Full_Scale	DWDS_F	2.2	NA	site_6	34.06
2/6/18	DWDS_F	Full_Scale	DWDS_F	2.2	NA	site_11	52.5
2/6/18	DWDS_F	Full_Scale	DWDS_F	2.08	NA	site_8	34.97
2/6/18	DWDS_F	Full_Scale	DWDS_F	1.35	NA	site_14	70
2/6/18	DWDS_F	Full_Scale	DWDS_F	1.02	NA	site_9	50.07
2/6/18	DWDS_F	Full_Scale	DWDS_F	2.2	NA	site_12	56.88
5/8/18	DWDS_F	Full_Scale	DWDS_F	1.3	NA	site_15	70
2/6/18	DWDS_F	Full_Scale	DWDS_F	2.18	NA	site_10	50.61
2/6/18	DWDS_F	Full_Scale	DWDS_F	1.31	NA	site_17	70
2/6/18	DWDS_F	Full_Scale	DWDS_F	1.97	NA	site_13	64.36
2/7/18	DWDS_F	Full_Scale	DWDS_F	2.5	NA	site_19	131.08
2/7/18	DWDS_F	Full_Scale	DWDS_F	2.2	NA	site_5	28.98
2/7/18	DWDS_F	Full_Scale	DWDS_F	2.6	NA	site_18	78.9
2/7/18	DWDS_F	Full_Scale	DWDS_F	2.4	NA	site_22	206.3
2/7/18	DWDS_F	Full_Scale	DWDS_F	2.1	NA	site_23	234.39
2/7/18	DWDS_F	Full_Scale	DWDS_F	2	NA	site_24	289.38
2/7/18	DWDS_F	Full_Scale	DWDS_F	2.2	NA	site_21	192.61
2/7/18	DWDS_F	Full_Scale	DWDS_F	2.4	NA	site_20	163.92
2/7/18	DWDS_F	Full_Scale	DWDS_F	2.4	NA	site_3	23.31
2/12/18	DWDS_F	Full_Scale	DWDS_F	NA	NA	site_13	64.36
2/13/18	DWDS_F	Full_Scale	DWDS_F	2.2	NA	site_1	19.35
2/13/18	DWDS_F	Full_Scale	DWDS_F	0.42	NA	site_7	34.69
2/13/18	DWDS_F	Full_Scale	DWDS_F	2.3	NA	site_6	34.06
2/13/18	DWDS_F	Full_Scale	DWDS_F	2.3	NA	site_11	52.5
2/13/18	DWDS_F	Full_Scale	DWDS_F	2.15	NA	site_8	34.97
2/13/18	DWDS_F	Full_Scale	DWDS_F	1.49	NA	site_14	70
2/13/18	DWDS_F	Full_Scale	DWDS_F	1.79	NA	site_9	50.07
2/13/18	DWDS_F	Full_Scale	DWDS_F	2.09	NA	site_12	56.88
2/13/18	DWDS_F	Full_Scale	DWDS_F	1.33	NA	site_15	70
2/13/18	DWDS_F	Full_Scale	DWDS_F	2.3	NA	site_10	50.61
2/13/18	DWDS_F	Full_Scale	DWDS_F	1.47	NA	site_17	70
2/13/18	DWDS_F	Full_Scale	DWDS_F	2.07	NA	site_13	64.36
2/14/18	DWDS_F	Full_Scale	DWDS_F	2.06	NA	site_19	131.08
2/14/18	DWDS_F	Full_Scale	DWDS_F	2.01	NA	site_5	28.98
2/14/18	DWDS_F	Full_Scale	DWDS_F	2.6	NA	site_18	78.9
2/14/18	DWDS_F	Full_Scale	DWDS_F	2.06	NA	site_22	206.3
2/14/18	DWDS_F	Full_Scale	DWDS_F	0.58	NA	site_23	234.39
2/14/18	DWDS_F	Full_Scale	DWDS_F	1.47	NA	site_24	289.38
2/14/18	DWDS_F	Full_Scale	DWDS_F	1.32	NA	site_21	192.61
2/14/18	DWDS_F	Full_Scale	DWDS_F	1.77	NA	site_20	163.92
2/14/18	DWDS_F	Full_Scale	DWDS_F	2.3	NA	site_3	23.31
2/20/18	DWDS_F	Full_Scale	DWDS_F	2.16	NA	site_1	19.35
2/20/18	DWDS_F	Full_Scale	DWDS_F	0.5	NA	site_7	34.69
2/20/18	DWDS_F	Full_Scale	DWDS_F	2.5	NA	site_6	34.06
2/20/18	DWDS_F	Full_Scale	DWDS_F	2.4	NA	site_11	52.5
2/20/18	DWDS_F	Full_Scale	DWDS_F	2.21	NA	site_8	34.97
2/20/18	DWDS_F	Full_Scale	DWDS_F	1.51	NA	site_14	70
2/20/18	DWDS_F	Full_Scale	DWDS_F	0.75	NA	site_9	50.07
2/20/18	DWDS_F	Full_Scale	DWDS_F	2.18	NA	site_12	56.88
4/3/18	DWDS_F	Full_Scale	DWDS_F	1.45	NA	site_15	70
2/20/18	DWDS_F	Full_Scale	DWDS_F	2.4	NA	site_10	50.61
2/20/18	DWDS_F	Full_Scale	DWDS_F	1.44	NA	site_17	70
2/20/18	DWDS_F	Full_Scale	DWDS_F	2.3	NA	site_13	64.36
2/21/18	DWDS_F	Full_Scale	DWDS_F	2.4	NA	site_19	131.08
2/21/18	DWDS_F	Full_Scale	DWDS_F	2.13	NA	site_5	28.98
2/21/18	DWDS_F	Full_Scale	DWDS_F	2.5	NA	site_18	78.9
2/21/18	DWDS_F	Full_Scale	DWDS_F	2.03	NA	site_22	206.3
2/21/18	DWDS_F	Full_Scale	DWDS_F	1.84	NA	site_23	234.39
2/21/18	DWDS_F	Full_Scale	DWDS_F	1.5	NA	site_24	289.38
2/21/18	DWDS_F	Full_Scale	DWDS_F	2.06	NA	site_21	192.61
2/21/18	DWDS_F	Full_Scale	DWDS_F	2.01	NA	site_20	163.92
2/21/18	DWDS_F	Full_Scale	DWDS_F	2.3	NA	site_3	23.31
2/27/18	DWDS_F	Full_Scale	DWDS_F	2.3	NA	site_1	19.35
2/27/18	DWDS_F	Full_Scale	DWDS_F	0.47	NA	site_7	34.69
2/27/18	DWDS_F	Full_Scale	DWDS_F	2.3	NA	site_6	34.06
2/27/18	DWDS_F	Full_Scale	DWDS_F	2.14	NA	site_11	52.5
2/27/18	DWDS_F	Full_Scale	DWDS_F	2.19	NA	site_8	34.97
2/27/18	DWDS_F	Full_Scale	DWDS_F	1.69	NA	site_14	70
2/27/18	DWDS_F	Full_Scale	DWDS_F	0.68	NA	site_9	50.07
2/27/18	DWDS_F	Full_Scale	DWDS_F	2.14	NA	site_12	56.88
1/2/18	DWDS_F	Full_Scale	DWDS_F	1.47	NA	site_15	70
2/27/18	DWDS_F	Full_Scale	DWDS_F	2.17	NA	site_10	50.61
2/27/18	DWDS_F	Full_Scale	DWDS_F	1.61	NA	site_17	70
2/27/18	DWDS_F	Full_Scale	DWDS_F	2.3	NA	site_13	64.36
2/28/18	DWDS_F	Full_Scale	DWDS_F	2.3	NA	site_19	131.08
2/28/18	DWDS_F	Full_Scale	DWDS_F	2.19	NA	site_5	28.98
2/28/18	DWDS_F	Full_Scale	DWDS_F	2.16	NA	site_18	78.9
2/28/18	DWDS_F	Full_Scale	DWDS_F	2.11	NA	site_22	206.3
2/28/18	DWDS_F	Full_Scale	DWDS_F	1.23	NA	site_23	234.39
2/28/18	DWDS_F	Full_Scale	DWDS_F	1.3	NA	site_24	289.38
2/28/18	DWDS_F	Full_Scale	DWDS_F	1.48	NA	site_21	192.61
2/28/18	DWDS_F	Full_Scale	DWDS_F	2.33	NA	site_20	163.92
2/28/18	DWDS_F	Full_Scale	DWDS_F	2.45	NA	site_3	23.31
3/2/18	DWDS_F	Full_Scale	DWDS_F	1.29	NA	site_14	70
3/6/18	DWDS_F	Full_Scale	DWDS_F	2.3	NA	site_1	19.35
3/6/18	DWDS_F	Full_Scale	DWDS_F	0.35	NA	site_7	34.69
3/6/18	DWDS_F	Full_Scale	DWDS_F	2.3	NA	site_6	34.06
3/6/18	DWDS_F	Full_Scale	DWDS_F	2.2	NA	site_11	52.5
3/6/18	DWDS_F	Full_Scale	DWDS_F	2.2	NA	site_8	34.97
3/6/18	DWDS_F	Full_Scale	DWDS_F	0.45	NA	site_14	70
3/6/18	DWDS_F	Full_Scale	DWDS_F	0.55	NA	site_9	50.07
3/6/18	DWDS_F	Full_Scale	DWDS_F	2.17	NA	site_12	56.88
2/6/18	DWDS_F	Full_Scale	DWDS_F	1.51	NA	site_15	70
3/6/18	DWDS_F	Full_Scale	DWDS_F	2.2	NA	site_10	50.61
3/6/18	DWDS_F	Full_Scale	DWDS_F	0.43	NA	site_17	70
3/6/18	DWDS_F	Full_Scale	DWDS_F	1.83	NA	site_13	64.36
3/7/18	DWDS_F	Full_Scale	DWDS_F	2.02	NA	site_19	131.08
3/7/18	DWDS_F	Full_Scale	DWDS_F	1.98	NA	site_5	28.98
3/7/18	DWDS_F	Full_Scale	DWDS_F	2.3	NA	site_18	78.9
3/7/18	DWDS_F	Full_Scale	DWDS_F	1.76	NA	site_22	206.3
3/7/18	DWDS_F	Full_Scale	DWDS_F	0.77	NA	site_23	234.39
3/7/18	DWDS_F	Full_Scale	DWDS_F	1.72	NA	site_24	289.38
3/7/18	DWDS_F	Full_Scale	DWDS_F	2.08	NA	site_21	192.61
3/7/18	DWDS_F	Full_Scale	DWDS_F	1.82	NA	site_20	163.92
3/7/18	DWDS_F	Full_Scale	DWDS_F	2.5	NA	site_3	23.31
3/12/18	DWDS_F	Full_Scale	DWDS_F	NA	NA	site_13	64.36
3/13/18	DWDS_F	Full_Scale	DWDS_F	2.4	NA	site_1	19.35
3/13/18	DWDS_F	Full_Scale	DWDS_F	0.3	NA	site_7	34.69
3/13/18	DWDS_F	Full_Scale	DWDS_F	2.3	NA	site_6	34.06
3/13/18	DWDS_F	Full_Scale	DWDS_F	2.16	NA	site_11	52.5
3/13/18	DWDS_F	Full_Scale	DWDS_F	2.2	NA	site_8	34.97
3/13/18	DWDS_F	Full_Scale	DWDS_F	0.63	NA	site_14	70
3/13/18	DWDS_F	Full_Scale	DWDS_F	0.29	NA	site_9	50.07
3/13/18	DWDS_F	Full_Scale	DWDS_F	2.3	NA	site_12	56.88
4/17/18	DWDS_F	Full_Scale	DWDS_F	1.52	NA	site_15	70
3/13/18	DWDS_F	Full_Scale	DWDS_F	2.1	NA	site_10	50.61
3/13/18	DWDS_F	Full_Scale	DWDS_F	0.59	NA	site_17	70
3/13/18	DWDS_F	Full_Scale	DWDS_F	2.05	NA	site_13	64.36
3/14/18	DWDS_F	Full_Scale	DWDS_F	1.74	NA	site_19	131.08
3/14/18	DWDS_F	Full_Scale	DWDS_F	1.69	NA	site_5	28.98
3/14/18	DWDS_F	Full_Scale	DWDS_F	1.75	NA	site_18	78.9
3/14/18	DWDS_F	Full_Scale	DWDS_F	1.54	NA	site_22	206.3
3/14/18	DWDS_F	Full_Scale	DWDS_F	0.59	NA	site_23	234.39
3/14/18	DWDS_F	Full_Scale	DWDS_F	0.15	NA	site_24	289.38
3/14/18	DWDS_F	Full_Scale	DWDS_F	0.67	NA	site_21	192.61
3/14/18	DWDS_F	Full_Scale	DWDS_F	1.7	NA	site_20	163.92
3/14/18	DWDS_F	Full_Scale	DWDS_F	2.4	NA	site_3	23.31
3/19/18	DWDS_F	Full_Scale	DWDS_F	NA	NA	site_24	289.38
3/20/18	DWDS_F	Full_Scale	DWDS_F	2.4	NA	site_1	19.35
3/20/18	DWDS_F	Full_Scale	DWDS_F	0.24	NA	site_7	34.69
3/20/18	DWDS_F	Full_Scale	DWDS_F	2.3	NA	site_6	34.06
3/20/18	DWDS_F	Full_Scale	DWDS_F	1.95	NA	site_11	52.5
3/20/18	DWDS_F	Full_Scale	DWDS_F	2.08	NA	site_8	34.97
3/20/18	DWDS_F	Full_Scale	DWDS_F	0.21	NA	site_14	70
3/20/18	DWDS_F	Full_Scale	DWDS_F	0.26	NA	site_9	50.07
3/20/18	DWDS_F	Full_Scale	DWDS_F	2.16	NA	site_12	56.88
4/10/18	DWDS_F	Full_Scale	DWDS_F	1.57	NA	site_15	70
3/20/18	DWDS_F	Full_Scale	DWDS_F	2.01	NA	site_10	50.61
3/20/18	DWDS_F	Full_Scale	DWDS_F	0.23	NA	site_17	70
3/20/18	DWDS_F	Full_Scale	DWDS_F	0.61	NA	site_13	64.36
3/21/18	DWDS_F	Full_Scale	DWDS_F	1.99	NA	site_19	131.08
3/21/18	DWDS_F	Full_Scale	DWDS_F	1.69	NA	site_5	28.98
3/21/18	DWDS_F	Full_Scale	DWDS_F	2.4	NA	site_18	78.9
3/21/18	DWDS_F	Full_Scale	DWDS_F	1.54	NA	site_22	206.3
3/21/18	DWDS_F	Full_Scale	DWDS_F	0.2	NA	site_23	234.39
3/21/18	DWDS_F	Full_Scale	DWDS_F	0.25	NA	site_24	289.38
3/21/18	DWDS_F	Full_Scale	DWDS_F	1.38	NA	site_21	192.61
3/21/18	DWDS_F	Full_Scale	DWDS_F	1.49	NA	site_20	163.92
3/21/18	DWDS_F	Full_Scale	DWDS_F	2.4	NA	site_3	23.31
3/27/18	DWDS_F	Full_Scale	DWDS_F	2.13	NA	site_1	19.35
3/27/18	DWDS_F	Full_Scale	DWDS_F	0.35	NA	site_7	34.69
3/27/18	DWDS_F	Full_Scale	DWDS_F	2.5	NA	site_6	34.06
3/27/18	DWDS_F	Full_Scale	DWDS_F	2.2	NA	site_11	52.5
3/27/18	DWDS_F	Full_Scale	DWDS_F	2.3	NA	site_8	34.97
3/27/18	DWDS_F	Full_Scale	DWDS_F	0.39	NA	site_14	70
3/27/18	DWDS_F	Full_Scale	DWDS_F	0.34	NA	site_9	50.07
3/27/18	DWDS_F	Full_Scale	DWDS_F	2.3	NA	site_12	56.88
2/20/18	DWDS_F	Full_Scale	DWDS_F	2	NA	site_15	70
3/27/18	DWDS_F	Full_Scale	DWDS_F	2.1	NA	site_10	50.61
3/27/18	DWDS_F	Full_Scale	DWDS_F	0.34	NA	site_17	70
3/27/18	DWDS_F	Full_Scale	DWDS_F	2.4	NA	site_13	64.36
3/28/18	DWDS_F	Full_Scale	DWDS_F	1.73	NA	site_19	131.08
3/28/18	DWDS_F	Full_Scale	DWDS_F	1.68	NA	site_5	28.98
3/28/18	DWDS_F	Full_Scale	DWDS_F	2.4	NA	site_18	78.9
3/28/18	DWDS_F	Full_Scale	DWDS_F	1.62	NA	site_22	206.3
3/28/18	DWDS_F	Full_Scale	DWDS_F	0.7	NA	site_23	234.39
3/28/18	DWDS_F	Full_Scale	DWDS_F	0.94	NA	site_24	289.38
3/28/18	DWDS_F	Full_Scale	DWDS_F	1.34	NA	site_21	192.61
3/28/18	DWDS_F	Full_Scale	DWDS_F	1.63	NA	site_20	163.92
3/28/18	DWDS_F	Full_Scale	DWDS_F	2.4	NA	site_3	23.31
4/2/18	DWDS_F	Full_Scale	DWDS_F	NA	NA	site_24	289.38
4/3/18	DWDS_F	Full_Scale	DWDS_F	2.01	NA	site_11	52.5
4/3/18	DWDS_F	Full_Scale	DWDS_F	1.98	NA	site_1	19.35
4/3/18	DWDS_F	Full_Scale	DWDS_F	2.03	NA	site_8	34.97
4/3/18	DWDS_F	Full_Scale	DWDS_F	1.61	NA	site_14	70
4/3/18	DWDS_F	Full_Scale	DWDS_F	0.21	NA	site_7	34.69
4/3/18	DWDS_F	Full_Scale	DWDS_F	0.36	NA	site_9	50.07
4/3/18	DWDS_F	Full_Scale	DWDS_F	1.99	NA	site_12	56.88
5/1/18	DWDS_F	Full_Scale	DWDS_F	2.4	NA	site_15	70
4/3/18	DWDS_F	Full_Scale	DWDS_F	2.03	NA	site_10	50.61
4/3/18	DWDS_F	Full_Scale	DWDS_F	1.59	NA	site_17	70
4/3/18	DWDS_F	Full_Scale	DWDS_F	2.05	NA	site_13	64.36
4/3/18	DWDS_F	Full_Scale	DWDS_F	2.4	NA	site_6	34.06
4/4/18	DWDS_F	Full_Scale	DWDS_F	1.93	NA	site_19	131.08
4/4/18	DWDS_F	Full_Scale	DWDS_F	1.89	NA	site_5	28.98
4/4/18	DWDS_F	Full_Scale	DWDS_F	1.49	NA	site_14	70
4/4/18	DWDS_F	Full_Scale	DWDS_F	2.4	NA	site_18	78.9
4/4/18	DWDS_F	Full_Scale	DWDS_F	1.63	NA	site_22	206.3
4/4/18	DWDS_F	Full_Scale	DWDS_F	1.32	NA	site_23	234.39
4/4/18	DWDS_F	Full_Scale	DWDS_F	1.04	NA	site_24	289.38
4/4/18	DWDS_F	Full_Scale	DWDS_F	1.63	NA	site_21	192.61
4/4/18	DWDS_F	Full_Scale	DWDS_F	1.51	NA	site_20	163.92
4/4/18	DWDS_F	Full_Scale	DWDS_F	2.5	NA	site_3	23.31
4/9/18	DWDS_F	Full_Scale	DWDS_F	NA	NA	site_13	64.36
4/10/18	DWDS_F	Full_Scale	DWDS_F	2.07	NA	site_1	19.35
4/10/18	DWDS_F	Full_Scale	DWDS_F	0.54	NA	site_7	34.69
4/10/18	DWDS_F	Full_Scale	DWDS_F	2.2	NA	site_6	34.06
4/10/18	DWDS_F	Full_Scale	DWDS_F	2.19	NA	site_11	52.5
4/10/18	DWDS_F	Full_Scale	DWDS_F	2.03	NA	site_8	34.97
4/10/18	DWDS_F	Full_Scale	DWDS_F	1.53	NA	site_14	70
4/10/18	DWDS_F	Full_Scale	DWDS_F	0.47	NA	site_9	50.07
4/10/18	DWDS_F	Full_Scale	DWDS_F	2.09	NA	site_12	56.88
5/15/18	DWDS_F	Full_Scale	DWDS_F	2.5	NA	site_15	70
4/10/18	DWDS_F	Full_Scale	DWDS_F	2.18	NA	site_10	50.61
4/10/18	DWDS_F	Full_Scale	DWDS_F	1.49	NA	site_17	70
4/10/18	DWDS_F	Full_Scale	DWDS_F	2	NA	site_13	64.36
4/11/18	DWDS_F	Full_Scale	DWDS_F	2.01	NA	site_19	131.08
4/11/18	DWDS_F	Full_Scale	DWDS_F	1.43	NA	site_5	28.98
4/11/18	DWDS_F	Full_Scale	DWDS_F	2.4	NA	site_18	78.9
4/11/18	DWDS_F	Full_Scale	DWDS_F	1.49	NA	site_22	206.3
4/11/18	DWDS_F	Full_Scale	DWDS_F	0.59	NA	site_23	234.39
4/11/18	DWDS_F	Full_Scale	DWDS_F	0.61	NA	site_24	289.38
4/11/18	DWDS_F	Full_Scale	DWDS_F	0.67	NA	site_21	192.61
4/11/18	DWDS_F	Full_Scale	DWDS_F	1.45	NA	site_20	163.92
4/11/18	DWDS_F	Full_Scale	DWDS_F	2.2	NA	site_3	23.31
4/17/18	DWDS_F	Full_Scale	DWDS_F	2.09	NA	site_1	19.35
4/17/18	DWDS_F	Full_Scale	DWDS_F	0.26	NA	site_7	34.69
4/17/18	DWDS_F	Full_Scale	DWDS_F	2.31	NA	site_6	34.06
4/17/18	DWDS_F	Full_Scale	DWDS_F	2.21	NA	site_11	52.5
4/17/18	DWDS_F	Full_Scale	DWDS_F	2.02	NA	site_8	34.97
4/17/18	DWDS_F	Full_Scale	DWDS_F	1.36	NA	site_14	70
4/17/18	DWDS_F	Full_Scale	DWDS_F	1.12	NA	site_9	50.07
4/17/18	DWDS_F	Full_Scale	DWDS_F	2.27	NA	site_12	56.88
5/22/18	DWDS_F	Full_Scale	DWDS_F	2.61	NA	site_15	70
4/17/18	DWDS_F	Full_Scale	DWDS_F	2.04	NA	site_10	50.61
4/17/18	DWDS_F	Full_Scale	DWDS_F	1.55	NA	site_17	70
4/17/18	DWDS_F	Full_Scale	DWDS_F	2.04	NA	site_13	64.36
4/18/18	DWDS_F	Full_Scale	DWDS_F	2.35	NA	site_19	131.08
4/18/18	DWDS_F	Full_Scale	DWDS_F	1.52	NA	site_5	28.98
4/18/18	DWDS_F	Full_Scale	DWDS_F	1.7	NA	site_18	78.9
4/18/18	DWDS_F	Full_Scale	DWDS_F	1.38	NA	site_22	206.3
4/18/18	DWDS_F	Full_Scale	DWDS_F	1.62	NA	site_23	234.39
4/18/18	DWDS_F	Full_Scale	DWDS_F	2.03	NA	site_21	192.61
4/18/18	DWDS_F	Full_Scale	DWDS_F	2.14	NA	site_20	163.92
4/18/18	DWDS_F	Full_Scale	DWDS_F	2.32	NA	site_3	23.31
4/24/18	DWDS_F	Full_Scale	DWDS_F	1.94	NA	site_1	19.35
4/24/18	DWDS_F	Full_Scale	DWDS_F	0.54	NA	site_7	34.69
4/24/18	DWDS_F	Full_Scale	DWDS_F	2.17	NA	site_6	34.06
4/24/18	DWDS_F	Full_Scale	DWDS_F	2.05	NA	site_11	52.5
4/24/18	DWDS_F	Full_Scale	DWDS_F	1.92	NA	site_8	34.97
4/24/18	DWDS_F	Full_Scale	DWDS_F	2.9	NA	site_14	70
4/24/18	DWDS_F	Full_Scale	DWDS_F	0.59	NA	site_9	50.07
4/24/18	DWDS_F	Full_Scale	DWDS_F	1.97	NA	site_12	56.88
4/24/18	DWDS_F	Full_Scale	DWDS_F	2.7	NA	site_15	70
4/24/18	DWDS_F	Full_Scale	DWDS_F	2.01	NA	site_10	50.61
4/24/18	DWDS_F	Full_Scale	DWDS_F	2.9	NA	site_17	70
4/24/18	DWDS_F	Full_Scale	DWDS_F	1.8	NA	site_13	64.36
4/25/18	DWDS_F	Full_Scale	DWDS_F	2.3	NA	site_19	131.08
4/25/18	DWDS_F	Full_Scale	DWDS_F	1.32	NA	site_5	28.98
4/25/18	DWDS_F	Full_Scale	DWDS_F	1.91	NA	site_18	78.9
4/25/18	DWDS_F	Full_Scale	DWDS_F	1.31	NA	site_22	206.3
4/25/18	DWDS_F	Full_Scale	DWDS_F	0.94	NA	site_23	234.39
4/25/18	DWDS_F	Full_Scale	DWDS_F	0.93	NA	site_24	289.38
4/25/18	DWDS_F	Full_Scale	DWDS_F	0.97	NA	site_21	192.61
4/25/18	DWDS_F	Full_Scale	DWDS_F	1.39	NA	site_20	163.92
4/25/18	DWDS_F	Full_Scale	DWDS_F	2.3	NA	site_3	23.31
5/1/18	DWDS_F	Full_Scale	DWDS_F	2.01	NA	site_11	52.5
5/1/18	DWDS_F	Full_Scale	DWDS_F	2.3	NA	site_1	19.35
5/1/18	DWDS_F	Full_Scale	DWDS_F	2.08	NA	site_8	34.97
5/1/18	DWDS_F	Full_Scale	DWDS_F	2.8	NA	site_14	70
5/1/18	DWDS_F	Full_Scale	DWDS_F	0.49	NA	site_7	34.69
5/1/18	DWDS_F	Full_Scale	DWDS_F	0.72	NA	site_9	50.07
5/1/18	DWDS_F	Full_Scale	DWDS_F	2.03	NA	site_12	56.88
8/8/17	DWDS_F	Full_Scale	DWDS_F	2.9	NA	site_15	70
5/1/18	DWDS_F	Full_Scale	DWDS_F	1.98	NA	site_10	50.61
5/1/18	DWDS_F	Full_Scale	DWDS_F	2.8	NA	site_17	70
5/1/18	DWDS_F	Full_Scale	DWDS_F	1.88	NA	site_13	64.36
5/1/18	DWDS_F	Full_Scale	DWDS_F	2.18	NA	site_6	34.06
5/2/18	DWDS_F	Full_Scale	DWDS_F	1.26	NA	site_19	131.08
5/2/18	DWDS_F	Full_Scale	DWDS_F	1.52	NA	site_5	28.98
5/2/18	DWDS_F	Full_Scale	DWDS_F	2.74	NA	site_14	70
5/2/18	DWDS_F	Full_Scale	DWDS_F	2.3	NA	site_18	78.9
5/2/18	DWDS_F	Full_Scale	DWDS_F	0.85	NA	site_22	206.3
5/2/18	DWDS_F	Full_Scale	DWDS_F	0.51	NA	site_23	234.39
5/2/18	DWDS_F	Full_Scale	DWDS_F	0.3	NA	site_24	289.38
5/2/18	DWDS_F	Full_Scale	DWDS_F	1.52	NA	site_21	192.61
5/2/18	DWDS_F	Full_Scale	DWDS_F	0.89	NA	site_20	163.92
5/2/18	DWDS_F	Full_Scale	DWDS_F	2.4	NA	site_3	23.31
5/7/18	DWDS_F	Full_Scale	DWDS_F	NA	NA	site_13	64.36
5/7/18	DWDS_F	Full_Scale	DWDS_F	NA	NA	site_24	289.38
5/8/18	DWDS_F	Full_Scale	DWDS_F	2.14	NA	site_11	52.5
5/8/18	DWDS_F	Full_Scale	DWDS_F	2.4	NA	site_1	19.35
5/8/18	DWDS_F	Full_Scale	DWDS_F	2.04	NA	site_8	34.97
5/8/18	DWDS_F	Full_Scale	DWDS_F	2.8	NA	site_14	70
5/8/18	DWDS_F	Full_Scale	DWDS_F	0.51	NA	site_7	34.69
5/8/18	DWDS_F	Full_Scale	DWDS_F	1.09	NA	site_9	50.07
5/8/18	DWDS_F	Full_Scale	DWDS_F	1.93	NA	site_12	56.88
8/22/17	DWDS_F	Full_Scale	DWDS_F	2.9	NA	site_15	70
5/8/18	DWDS_F	Full_Scale	DWDS_F	2.08	NA	site_10	50.61
5/8/18	DWDS_F	Full_Scale	DWDS_F	2.7	NA	site_17	70
5/8/18	DWDS_F	Full_Scale	DWDS_F	1.85	NA	site_13	64.36
5/8/18	DWDS_F	Full_Scale	DWDS_F	2.3	NA	site_6	34.06
5/9/18	DWDS_F	Full_Scale	DWDS_F	1.32	NA	site_19	131.08
5/9/18	DWDS_F	Full_Scale	DWDS_F	1.28	NA	site_5	28.98
5/9/18	DWDS_F	Full_Scale	DWDS_F	1.2	NA	site_18	78.9
5/9/18	DWDS_F	Full_Scale	DWDS_F	0.89	NA	site_22	206.3
5/9/18	DWDS_F	Full_Scale	DWDS_F	1.23	NA	site_23	234.39
5/9/18	DWDS_F	Full_Scale	DWDS_F	1.34	NA	site_24	289.38
5/9/18	DWDS_F	Full_Scale	DWDS_F	1.4	NA	site_21	192.61
5/9/18	DWDS_F	Full_Scale	DWDS_F	0.49	NA	site_20	163.92
5/9/18	DWDS_F	Full_Scale	DWDS_F	2.3	NA	site_3	23.31
5/15/18	DWDS_F	Full_Scale	DWDS_F	1.99	NA	site_11	52.5
5/15/18	DWDS_F	Full_Scale	DWDS_F	2.19	NA	site_1	19.35
5/15/18	DWDS_F	Full_Scale	DWDS_F	1.95	NA	site_8	34.97
5/15/18	DWDS_F	Full_Scale	DWDS_F	2.9	NA	site_14	70
5/15/18	DWDS_F	Full_Scale	DWDS_F	0.54	NA	site_7	34.69
5/15/18	DWDS_F	Full_Scale	DWDS_F	1.04	NA	site_9	50.07
5/15/18	DWDS_F	Full_Scale	DWDS_F	2.1	NA	site_12	56.88
8/1/17	DWDS_F	Full_Scale	DWDS_F	3	NA	site_15	70
5/15/18	DWDS_F	Full_Scale	DWDS_F	2.06	NA	site_10	50.61
5/15/18	DWDS_F	Full_Scale	DWDS_F	2.9	NA	site_17	70
5/15/18	DWDS_F	Full_Scale	DWDS_F	1.96	NA	site_13	64.36
5/15/18	DWDS_F	Full_Scale	DWDS_F	2.09	NA	site_6	34.06
5/16/18	DWDS_F	Full_Scale	DWDS_F	1.95	NA	site_19	131.08
5/16/18	DWDS_F	Full_Scale	DWDS_F	1.26	NA	site_5	28.98
5/16/18	DWDS_F	Full_Scale	DWDS_F	2.3	NA	site_18	78.9
5/16/18	DWDS_F	Full_Scale	DWDS_F	1.01	NA	site_22	206.3
5/16/18	DWDS_F	Full_Scale	DWDS_F	1.08	NA	site_23	234.39
5/16/18	DWDS_F	Full_Scale	DWDS_F	1.09	NA	site_24	289.38
5/16/18	DWDS_F	Full_Scale	DWDS_F	1.17	NA	site_21	192.61
5/16/18	DWDS_F	Full_Scale	DWDS_F	0.53	NA	site_20	163.92
5/16/18	DWDS_F	Full_Scale	DWDS_F	2.5	NA	site_3	23.31
5/22/18	DWDS_F	Full_Scale	DWDS_F	2.09	NA	site_11	52.5
5/22/18	DWDS_F	Full_Scale	DWDS_F	2.21	NA	site_1	19.35
5/22/18	DWDS_F	Full_Scale	DWDS_F	1.84	NA	site_8	34.97
5/22/18	DWDS_F	Full_Scale	DWDS_F	2.88	NA	site_14	70
5/22/18	DWDS_F	Full_Scale	DWDS_F	0.31	NA	site_7	34.69
5/22/18	DWDS_F	Full_Scale	DWDS_F	1.51	NA	site_9	50.07
5/22/18	DWDS_F	Full_Scale	DWDS_F	2.08	NA	site_12	56.88
8/15/17	DWDS_F	Full_Scale	DWDS_F	3.2	NA	site_15	70
5/22/18	DWDS_F	Full_Scale	DWDS_F	2.05	NA	site_10	50.61
5/22/18	DWDS_F	Full_Scale	DWDS_F	2.72	NA	site_17	70
5/22/18	DWDS_F	Full_Scale	DWDS_F	1.98	NA	site_13	64.36
5/22/18	DWDS_F	Full_Scale	DWDS_F	2.07	NA	site_6	34.06
5/23/18	DWDS_F	Full_Scale	DWDS_F	2.02	NA	site_19	131.08
5/23/18	DWDS_F	Full_Scale	DWDS_F	1.43	NA	site_5	28.98
5/23/18	DWDS_F	Full_Scale	DWDS_F	2.5	NA	site_18	78.9
5/23/18	DWDS_F	Full_Scale	DWDS_F	1.63	NA	site_22	206.3
5/23/18	DWDS_F	Full_Scale	DWDS_F	1.54	NA	site_23	234.39
5/23/18	DWDS_F	Full_Scale	DWDS_F	1.81	NA	site_24	289.38
5/23/18	DWDS_F	Full_Scale	DWDS_F	1.77	NA	site_21	192.61
5/23/18	DWDS_F	Full_Scale	DWDS_F	1.7	NA	site_20	163.92
5/23/18	DWDS_F	Full_Scale	DWDS_F	2.5	NA	site_3	23.31
