# Supplementary material for: Effect of disinfectant residual, pH, and temperature on microbial abundance in disinfected drinking water distribution systems
Source: Royal Society of Chemistry journal article supplement (doi:10.1039/d0ew00809e), 2020-11-10
Supplement: d0ew00809e3.csv [file d0ew00809e3.csv]

	core_id	sample_date	broad_location	sampling_year	location_code	site	disinfectant	wtp	flow_cytometer	regrowth_key	std_note	HPC_label	avg_cells_per_mL_gmean	avg_cells_per_mL_gstd	ICC_to_TCC	ICC_to_TCC_stdev	intra_ATP_gmean_nM	intra_ATP_gstd_nM	total_ATP_gmean_nM	total_ATP_gstd_nM	extra_ATP_gmean_nM	extra_ATP_gstd_nM	HPC_gmean_MPN_per_100mL	HPC_gstd_MPN_per_100mL	HPC_label.1	pH	temp_C	total_Cl2_mg.L	free_Cl2_mg.L	water_age_h	summer_water_age_h
1	SGPI_1	2/9/18	DWDS_F	2018	site_9	other_site_in_DWDS_F	Chloramine	No	Canto	NA	NA	ADL	1721.4856	1.14025872	0.065944281	4.38E-05	3.41E-05	1.600117988	0.000994545	1.070042836	0.00096049	1.189699922	2999.9	1	ADL	8.1	17.8	1.78	0	50.07	NA
2	SGPI_2	2/9/18	DWDS_F	2018	site_1	other_site_in_DWDS_F	Chloramine	No	Canto	NA	NA	NA	862.882012	1.18545664	0.030989776	4.26E-05	1.00E-05	1	0.000661154	1.052940985	0.000701023	1.060273006	275.7030468	1.078833006	NA	8.21	16.5	2.21	0	19.35	NA
3	SGPI_3	2/9/18	DWDS_F	2018	site_7	other_site_in_DWDS_F	Chloramine	No	Canto	NA	NA	NA	31952.1376	1.02142502	0.332592922	1.12E-05	0.001801706	1.449860976	0.005927769	1.011415474	0.004126064	1.038814511	1149.558781	2.167180272	NA	8.02	18.3	0.31	0.06	34.69	NA
4	SGPI_4	2/9/18	DWDS_F	2018	site_15	site_15	Chloramine	No	Canto	NA	NA	NA	7889.97744	1.03119546	0.231859188	3.11E-05	0.003975449	1.583965179	0.006317807	1.100699758	0.002342358	1.139037195	53.93774189	1.030609104	NA	8.15	16.7	1.76	0.03	70	9.43
5	SGPI_5	2/9/18	DWDS_F	2018	site_10	site_10	Chloramine	No	Canto	NA	NA	NA	614.476598	1.2319285	0.027213952	5.46E-05	1.00E-05	1	0.00086386	1.118821923	0.00097981	1.055320792	4.647580015	1.857162678	NA	8.09	16.9	2.16	0.01	50.61	NA
6	SGPI_6	2/9/18	DWDS_F	2018	site_16	other_site_in_DWDS_F	Chloramine	No	Canto	NA	NA	NA	16469.3871	1.02622961	0.468656174	3.37E-05	0.010599329	4.279335718	0.01158027	1.018910478	0.000980942	4.156264624	117.8966497	1.293151047	NA	8.14	17.8	1.32	0.02	70	11.67
7	SGPI_7	2/14/18	DWDS_F	2018	site_15	site_15	Chloramine	No	Canto	NA	NA	BDL	4394.8898	1.65352208	0.054069967	2.04E-05	1.00E-05	1	0.004786995	1.037279626	0.004962584	1.241905313	0.5	1	BDL	8.45	18.2	2.9	0.54	70	9.43
8	SGPI_8	2/14/18	DWDS_F	2018	site_24	site_24	Chloramine	No	Canto	NA	NA	NA	5575.81991	1.0524561	0.341117661	6.85E-05	0.00044455	1.543704087	0.001321447	1.114626673	0.000876897	1.068002663	5.433231083	1.489093615	NA	8.18	20.4	1.23	0.043333333	289.38	NA
9	SGPI_9	2/15/18	DWDS_F	2018	site_ut	site_ut	Chloramine	No	Canto	NA	NA	NA	4127.28016	1.13722783	0.057610398	1.59E-05	0.000351343	1.503765	0.004450383	1.095947852	0.00409904	1.029663771	NA	NA	NA	8.18	17.7	2.03	0.03	24	NA
10	SGPI_10	2/16/18	DWDS_F	2018	site_10	site_10	Chloramine	No	Canto	NA	NA	NA	4950.92505	1.20577439	0.075404221	1.84E-05	0.001001647	1.481657031	0.004860931	1.029719894	0.003859284	1.065356513	110	1	NA	8.29	21.3	1.98	0.39	50.61	NA
11	SGPI_11	2/19/18	DWDS_F	2018	site_ut	site_ut	Chloramine	No	Canto	NA	NA	NA	304.366745	1.53208302	0.13000471	0.000659474	1.00E-05	1	0.000203521	1.160284794	0.000327505	1.529026838	NA	NA	NA	8.1	15.5	2.49	0.04	24	NA
12	SGPI_12	3/1/18	DWDS_F	2018	site_15	site_15	Chloramine	No	Canto	NA	NA	NA	21424.4761	1.02838785	0.880199437	5.94E-05	0.005260257	1.563781443	0.008380612	1.085653752	0.003120354	1.125508033	42.72867889	1.045687151	NA	8.015	20.4	0.91	0.11	70	9.43
13	SGPI_13	3/1/18	DWDS_F	2018	site_10	site_10	Chloramine	No	Canto	NA	NA	ADL	1051.10492	1.09016841	0.651943756	0.000795195	6.86E-05	2.033297962	0.000793229	1.562858685	0.000724606	1.300681872	2694.171123	1.164173618	ADL	8.196	23.9	2.07	0.163333333	50.61	NA
14	SGPI_14	3/1/18	DWDS_F	2018	site_24	site_24	Chloramine	No	Canto	NA	NA	NA	15342.0896	1.01983493	0.755064401	6.35E-05	0.001661663	1.597295176	0.002959001	1.241377421	0.001297338	1.005153709	67.76016529	1.519807402	NA	8.094	15.6	1.16	0.116666667	289.38	NA
17	SGPI_17	3/1/18	DWDS_F	2018	site_ut	site_ut	Chloramine	No	Canto	NA	NA	NA	3362.76836	1.25546698	0.276819173	0.000106242	1.00E-05	1	0.000622835	1.189033249	0.001127593	1.133431251	360.8434564	1.22281943	NA	8.07	14.8	2.2	0.07	24	NA
18	SGPI_18	3/5/18	DWDS_F	2018	site_ut	site_ut	Chloramine	No	Canto	NA	NA	NA	438.972807	1.47200713	0.472044918	0.001707957	1.00E-05	1	0.000198102	1.397964452	0.00049271	1.835079448	NA	NA	NA	8.17	17.8	2	0.08	24	NA
21	SGPI_21	3/12/18	DWDS_F	2018	site_ut	site_ut	Chloramine	No	Canto	NA	NA	NA	2053.22521	1.31587836	0.459581506	0.000315898	1.00E-05	1	0.000435047	1.089050243	0.000417682	1.107420386	NA	NA	NA	8.14	18.5	2.38	0.04	24	NA
22	SGPI_22	3/19/18	DWDS_F	2018	site_ut	site_ut	Chloramine	No	Canto	NA	NA	NA	1915.05925	1.54441254	0.08160935	6.60E-05	1.00E-05	1	0.000340902	1.168123059	0.000403887	1.333261435	NA	NA	NA	8.02	14.3	2.52	0.04	24	NA
23	SGPI_23	3/22/18	DWDS_F	2018	site_15	site_15	Chloramine	No	Canto	NA	NA	NA	59306.899	1.01570283	0.807469213	1.78E-05	0.011149539	1.443526028	0.016062152	1.014696332	0.004912614	1.026722333	59.71959477	1.07613708	NA	7.86	18.2	0.235	0.07	70	9.43
24	SGPI_24	3/22/18	DWDS_F	2018	site_10	site_10	Chloramine	No	Canto	NA	NA	NA	965.152448	1.22758174	0.464752496	0.000672193	1.00E-05	1	0.000696455	1.023784573	0.000749921	1.029783891	34.74910071	1.010226309	NA	8.07	18.1	1.95	0.5	50.61	NA
25	SGPI_25	3/22/18	DWDS_F	2018	site_24	site_24	Chloramine	No	Canto	NA	NA	NA	4097.19329	1.09099488	0.71411454	0.000236081	0.000170489	1.49362358	0.000434769	1.064722839	0.00026428	1.04750975	2419.6	1	NA	7.93	17.1	0.53	0.05	289.38	NA
28	SGPI_28	3/22/18	DWDS_F	2018	site_ut	site_ut	Chloramine	No	Canto	NA	NA	NA	498.748296	1.37029686	0.393056314	0.001139062	1.00E-05	1	0.000265704	1.092110248	0.000309522	1.00955305	23.29463458	1.030817926	NA	8.01	16.6	2	0.04	24	NA
31	SGPI_31	3/26/18	DWDS_F	2018	site_ut	site_ut	Chloramine	No	Canto	NA	NA	NA	342.792401	1.11100321	0.304340114	0.001038731	1.89E-05	1.486401608	0.000211027	1.036094	0.0001921	1.065785609	6.30634601	1.838439592	NA	7.84	13.7	0.03	0.01	24	NA
32	SGPI_32	3/27/18	DWDS_F	2018	site_11	other_site_in_DWDS_F	Chloramine	No	Canto	NA	NA	NA	2139.40418	1.02321513	0.603142095	0.000337784	4.44E-05	1.825356991	0.000614834	1.484870146	0.000570483	1.061644381	NA	NA	NA	8.08	15.2	1.87	0.08	52.5	NA
33	SGPI_33	3/27/18	DWDS_F	2018	site_8	other_site_in_DWDS_F	Chloramine	No	Canto	NA	NA	NA	1553.84373	1.19093204	0.712804322	0.000709662	0.000234169	1.458918122	0.000847893	1.0460794	0.000613724	1.016936564	5.470831747	1.503688327	NA	8.04	15.4	1.87	0.23	34.97	NA
34	SGPI_34	3/27/18	DWDS_F	2018	site_14	other_site_in_DWDS_F	Chloramine	No	Canto	NA	NA	NA	36057.5019	1.0391668	0.762600697	2.78E-05	0.003072077	1.475529987	0.005756161	1.048106413	0.002684084	1.03858639	1.414213562	1.632526919	NA	8.07	18.8	0.46	0.02	70	12.36
35	SGPI_35	3/27/18	DWDS_F	2018	site_12	other_site_in_DWDS_F	Chloramine	No	Canto	NA	NA	NA	2074.21097	1.03976109	0.88122163	0.000588163	1.00E-05	1	0.001041276	1.028909259	0.001176664	1.044058188	NA	NA	NA	7.81	16.3	1.11	0.01	56.88	NA
36	SGPI_36	3/27/18	DWDS_F	2018	site_15	site_15	Chloramine	No	Canto	NA	NA	NA	47473.5009	1.02587166	0.862781359	2.46E-05	0.005742452	1.514621801	0.012538735	1.128851086	0.006796282	1.009838812	40.20373117	1.262214642	NA	7.94	19.3	0.39	0	70	9.43
37	SGPI_37	3/27/18	DWDS_F	2018	site_17	other_site_in_DWDS_F	Chloramine	No	Canto	NA	NA	NA	39856.0943	1.03389311	0.800436956	2.68E-05	0.001613626	1.457410651	0.00287185	1.018939883	0.001258225	1.042020787	NA	NA	NA	8.03	19.4	1.05	0.01	70	8.92
38	SGPI_38	3/27/18	DWDS_F	2018	site_6	other_site_in_DWDS_F	Chloramine	No	Canto	NA	NA	NA	380.255412	1.26695759	1.087380374	0.005815993	1.00E-05	1	0.000218716	1.050041216	0.000282943	1.060110071	NA	NA	NA	8.19	15.8	1.66	0.26	34.06	NA
39	SGPI_39	3/27/18	DWDS_F	2018	site_7	other_site_in_DWDS_F	Chloramine	No	Canto	NA	NA	NA	53769.0145	1.03011903	0.710498278	1.67E-05	0.002236403	1.45533344	0.005578832	1.04153796	0.003342429	1.016461558	NA	NA	NA	7.96	18.4	0.64	0	34.69	NA
40	SGPI_40	3/27/18	DWDS_F	2018	site_10	site_10	Chloramine	No	Canto	NA	NA	NA	2171.19789	1.13414797	0.792627535	0.000514572	8.15E-05	1.47093168	0.000719612	1.071996649	0.000638111	1.007205635	1	1	NA	8.02	15.6	1.88	0.03	50.61	NA
41	SGPI_41	3/27/18	DWDS_F	2018	site_16	other_site_in_DWDS_F	Chloramine	No	Canto	NA	NA	NA	14364.2112	1.01691483	0.834209216	7.75E-05	0.000978063	1.468953714	0.00217856	1.029341745	0.001200497	1.047988829	35.28101472	1.123123753	NA	8.05	20.6	1.02	0.05	70	11.67
42	SGPI_42	3/28/18	DWDS_F	2018	site_15	site_15	Chloramine	No	Canto	NA	NA	NA	13733.6876	1.04323796	0.162789744	1.27E-05	0.002009015	1.479101436	0.005246567	1.011233871	0.003237553	1.079419804	64.06652792	1.769100169	NA	7.84	24	1.11	0.04	70	9.43
43	SGPI_43	3/28/18	DWDS_F	2018	site_10	site_10	Chloramine	No	Canto	NA	NA	NA	1349.56107	1.11372509	0.019450603	1.61E-05	1.00E-05	1	0.001085489	1.011050919	0.001079915	1.00738377	7.531932023	1.347438054	NA	7.91	22.3	1.61	0.15	50.61	NA
44	SGPI_44	3/28/18	DWDS_F	2018	site_24	site_24	Chloramine	No	Canto	NA	NA	NA	8816.46166	1.06457923	0.092802685	1.13E-05	0.000932548	1.460409673	0.001499086	1.038121189	0.000566538	1.027181001	50.79842517	1.011198003	NA	8.17	24.4	0.78	0.11	289.38	NA
47	SGPI_47	3/28/18	DWDS_F	2018	site_ut	site_ut	Chloramine	No	Canto	NA	exclude	NA	598.413979	1.14744319	0.018069426	3.47E-05	3.69E-05	1.559431904	0.000312552	1.176394165	0.000275648	1.0236819	25.6	1	NA	8.14	16.8	2.18	0.05	24	NA
48	SGPI_48	4/2/18	DWDS_F	2018	site_ut	site_ut	Chloramine	No	Canto	NA	NA	NA	639.081415	1.54986128	0.105126718	0.000255653	1.00E-05	1	0.00150972	1.050825156	0.001491954	1.043515678	NA	NA	NA	8.05	17.6	2.2	0.11	24	NA
51	SGPI_51	4/9/18	DWDS_F	2018	site_ut	site_ut	Chloramine	No	Canto	NA	NA	NA	1490.9484	1.08897587	0.253835613	0.000193211	1.00E-05	1	0.001900782	1.062042169	0.001966299	1.067619743	NA	NA	NA	8.14	20.8	2.32	0.06	24	NA
54	SGPI_54	4/16/18	DWDS_F	2018	site_ut	site_ut	Chloramine	No	Canto	NA	NA	NA	1217.46698	1.6400788	0.437360456	0.000619156	1.00E-05	1	0.001924256	1.020329073	0.001979197	1.04916258	NA	NA	NA	8.28	18.8	2.52	0.05	24	NA
55	SGPI_55	4/19/18	DWDS_F	2018	site_15	site_15	Chloramine	No	Canto	NA	NA	NA	5143.02841	1.0682052	0.589315902	0.000143084	0.000887932	1.439559089	0.002902031	1.018973731	0.002014099	1.016869169	91.22466772	1.033888942	NA	8.08	21.9	1.88	0.28	70	9.43
56	SGPI_56	4/19/18	DWDS_F	2018	site_10	site_10	Chloramine	No	Canto	NA	NA	NA	2540.94492	1.27050193	0.924501245	0.00058584	1.00E-05	1	0.001702613	1.020056703	0.001908642	1.151123313	8.049844719	1.008822741	NA	8.13	20.7	1.83	0.1	50.61	NA
57	SGPI_57	4/19/18	DWDS_F	2018	site_24	site_24	Chloramine	No	Canto	NA	NA	NA	975.749966	1.32175849	0.394750487	0.000569184	1.00E-05	1	0.000185203	1.035326783	0.000208307	1.159118413	17.29739865	1.116571194	NA	7.9	18.7	0.48	0.33	289.38	NA
60	SGPI_60	4/19/18	DWDS_F	2018	site_ut	site_ut	Chloramine	No	Canto	NA	NA	NA	900.237955	1.23598705	0.474319666	0.000706502	1.00E-05	1	0.000858191	1.017563059	0.00089286	1.027629483	48.89498952	1.020452084	NA	8.12	19.1	2.4	0.1	24	NA
63	SGPI_63	4/23/18	DWDS_F	2018	site_ut	site_ut	Chloramine	No	Canto	NA	NA	NA	2514.30937	1.04777752	0.730033046	0.000397646	1.00E-05	1	0.004078702	1.075492202	0.004168667	1.046746289	299.1334819	1.040260514	NA	8.06	19.6	2.14	0.04	24	NA
64	SGPI_64	4/26/18	DWDS_F	2018	site_15	site_15	Chloramine	No	Canto	NA	NA	NA	39766.0848	1.05676651	0.773039224	2.57E-05	0.006392519	1.518882126	0.00747064	1.039799507	0.001078121	1.107167511	15.79873413	3.932202251	NA	7.82	NA	1.25	0.15	70	9.43
65	SGPI_65	4/26/18	DWDS_F	2018	site_10	site_10	Chloramine	No	Canto	NA	exclude	NA	3026.38974	1.2502573	0.64686225	0.000314928	1.00E-05	1	0.000848483	1.027491968	0.000841184	1.109919915	4.1	1	NA	7.72	NA	2.115	0.105	50.61	NA
66	SGPI_66	4/26/18	DWDS_F	2018	site_24	site_24	Chloramine	No	Canto	NA	NA	NA	21399.4562	1.05418279	0.767435335	4.75E-05	0.002908118	1.501453305	0.003643559	1.040992526	0.000735441	1.081987332	130.3654862	1.033076589	NA	NA	NA	0.89	0.07	289.38	NA
69	SGPI_69	4/26/18	DWDS_F	2018	site_ut	site_ut	Chloramine	No	Canto	NA	NA	NA	3419.71544	1.65069812	1.03189247	0.000647715	3.15E-05	1.496455806	0.000705504	1.094530142	0.000674019	1.020482115	1299.7	1	NA	8.12	19.1	2.4	0.1	24	NA
70	SGPI_70	2/3/16	DWDS_D	2016	site_D1	other_site_in_DWDS_D	Chlorine	No	Accuri	NA	NA	NA	142.7194	1.11139957	0.375382723	0.003139063	NA	NA	NA	NA	NA	NA	NA	NA	NA	8.01	19	NA	0.96	NA	NA
71	SGPI_71	2/3/16	DWDS_D	2016	site_D2	other_site_in_DWDS_D	Chlorine	No	Accuri	NA	NA	NA	10	1	0.124920107	0.014930521	NA	NA	NA	NA	NA	NA	NA	NA	NA	7.98	20.9	NA	1.38	NA	NA
72	SGPI_72	2/3/16	DWDS_D	2016	site_D3	other_site_in_DWDS_D	Chlorine	No	Accuri	NA	NA	NA	122.367266	1.37472148	0.376050751	0.004540143	NA	NA	NA	NA	NA	NA	NA	NA	NA	8.05	15.7	NA	0.96	NA	NA
73	SGPI_73	2/3/16	DWDS_D	2016	site_D4	other_site_in_DWDS_D	Chlorine	No	Accuri	NA	NA	NA	144.808023	1.20721488	0.451351734	0.004103891	NA	NA	NA	NA	NA	NA	NA	NA	NA	7.89	18.7	NA	1.43	NA	NA
74	SGPI_74	2/3/16	DWDS_D	2016	site_D5	other_site_in_DWDS_D	Chlorine	No	Accuri	NA	NA	NA	577.896995	1.0526891	0.153449914	0.000282788	NA	NA	NA	NA	NA	NA	NA	NA	NA	7.92	17.7	NA	0.42	NA	NA
75	SGPI_75	2/3/16	DWDS_D	2016	site_D6	other_site_in_DWDS_D	Chlorine	No	Accuri	NA	NA	NA	59.3697579	1.18363493	0.26783132	0.005517625	NA	NA	NA	NA	NA	NA	NA	NA	NA	8	19.2	NA	1.14	NA	NA
76	SGPI_76	2/3/16	DWDS_E	2016	site_E1	other_site_in_DWDS_E	Chlorine	No	Accuri	NA	NA	NA	10	1	0	NA	NA	NA	NA	NA	NA	NA	NA	NA	NA	7.88	23.6	NA	1.98	NA	NA
77	SGPI_77	2/3/16	DWDS_E	2016	site_E2	other_site_in_DWDS_E	Chlorine	No	Accuri	NA	NA	NA	10	1	0	NA	NA	NA	NA	NA	NA	NA	NA	NA	NA	7.94	22.2	NA	2.04	NA	NA
78	SGPI_78	2/3/16	DWDS_E	2016	site_E3	other_site_in_DWDS_E	Chlorine	No	Accuri	NA	NA	NA	36.3016446	2.03786006	1.145179565	0.122409587	NA	NA	NA	NA	NA	NA	NA	NA	NA	7.92	23	NA	2.14	NA	NA
79	SGPI_79	2/3/16	DWDS_E	2016	site_E4	other_site_in_DWDS_E	Chlorine	No	Accuri	NA	NA	NA	10	1	0	NA	NA	NA	NA	NA	NA	NA	NA	NA	NA	7.87	23.1	NA	1.52	NA	NA
80	SGPI_80	2/3/16	DWDS_E	2016	site_E5	other_site_in_DWDS_E	Chlorine	No	Accuri	NA	NA	NA	92.4402826	1.17408447	1.134349093	0.03213238	NA	NA	NA	NA	NA	NA	NA	NA	NA	7.93	22.9	NA	1.29	NA	NA
81	SGPI_81	2/3/16	DWDS_D	2016	site_D7	other_site_in_DWDS_D	Chlorine	No	Accuri	NA	NA	NA	64.5448507	1.35220781	0.932337184	0.039326958	NA	NA	NA	NA	NA	NA	NA	NA	NA	7.4	21.8	NA	1.48	NA	NA
90	SGPI_90	4/21/16	DWDS_C	2016	site_C1	other_site_in_DWDS_C	Chloramine	No	Accuri	NA	NA	NA	419.457512	1.000266	0.14574871	0.000354487	NA	NA	NA	NA	NA	NA	NA	NA	NA	NA	NA	2.31	NA	NA	NA
91	SGPI_91	4/21/16	DWDS_C	2016	site_C2	other_site_in_DWDS_C	Chloramine	No	Accuri	NA	NA	NA	275.364275	1.24340799	0.146000694	0.000666297	NA	NA	NA	NA	NA	NA	NA	NA	NA	NA	NA	2.42	NA	NA	NA
92	SGPI_92	4/21/16	DWDS_C	2016	site_C3	other_site_in_DWDS_C	Chloramine	No	Accuri	NA	NA	NA	2995.923352	1.066100247	0.465076349	0.000217961	NA	NA	NA	NA	NA	NA	NA	NA	NA	NA	NA	1.66	NA	NA	NA
93	SGPI_93	4/21/16	DWDS_C	2016	site_C4	other_site_in_DWDS_C	Chloramine	No	Accuri	NA	NA	NA	3575.49341	1.1032527	0.354875068	0.000117248	NA	NA	NA	NA	NA	NA	NA	NA	NA	NA	NA	1.57	NA	NA	NA
94	SGPI_94	4/21/16	DWDS_C	2016	site_C5	other_site_in_DWDS_C	Chloramine	No	Accuri	NA	NA	NA	332.153925	1.07172188	0.195868988	0.000643928	NA	NA	NA	NA	NA	NA	NA	NA	NA	NA	NA	2.36	NA	NA	NA
95	SGPI_95	4/21/16	DWDS_C	2016	site_C6	other_site_in_DWDS_C	Chloramine	No	Accuri	NA	NA	NA	242.896549	1.40586596	0.081675454	0.000473582	NA	NA	NA	NA	NA	NA	NA	NA	NA	NA	NA	2.39	NA	NA	NA
96	SGPI_96	4/21/16	DWDS_C	2016	site_C7	other_site_in_DWDS_C	Chloramine	No	Accuri	NA	NA	NA	305.328926	1.29182151	0.158087526	0.000682092	NA	NA	NA	NA	NA	NA	NA	NA	NA	NA	NA	2.37	NA	NA	NA
97	SGPI_97	4/21/16	DWDS_C	2016	site_C8	other_site_in_DWDS_C	Chloramine	No	Accuri	NA	NA	NA	196.646444	1.61358647	0.035810108	0.000293925	NA	NA	NA	NA	NA	NA	NA	NA	NA	NA	NA	2.43	NA	NA	NA
98	SGPI_98	4/21/16	DWDS_C	2016	site_C9	other_site_in_DWDS_C	Chloramine	No	Accuri	NA	NA	NA	351.038221	1.14629048	0.127861612	0.000420596	NA	NA	NA	NA	NA	NA	NA	NA	NA	NA	NA	2.35	NA	NA	NA
99	SGPI_99	4/21/16	DWDS_C	2016	site_C10	other_site_in_DWDS_C	Chloramine	No	Accuri	NA	NA	NA	39703.3242	1.07666147	0.483838325	1.45E-05	NA	NA	NA	NA	NA	NA	NA	NA	NA	NA	NA	0.05	NA	NA	NA
100	SGPI_100	4/21/16	DWDS_C	2016	site_C11	other_site_in_DWDS_C	Chloramine	No	Accuri	NA	NA	NA	100546.053	1.01237438	0.684322054	8.40E-06	NA	NA	NA	NA	NA	NA	NA	NA	NA	NA	NA	0.68	NA	NA	NA
101	SGPI_101	4/21/16	DWDS_C	2016	site_C12	other_site_in_DWDS_C	Chloramine	No	Accuri	NA	NA	NA	114849.774	1.24681057	0.634201498	7.76E-06	NA	NA	NA	NA	NA	NA	NA	NA	NA	NA	NA	0.39	NA	NA	NA
108	SGPI_108	7/20/16	DWDS_B	2016	site_B1	other_site_in_DWDS_B	Chlorine	No	Accuri	NA	NA	NA	741.205585	1.13822906	0.318907877	0.000512424	NA	NA	NA	NA	NA	NA	NA	NA	NA	NA	NA	NA	0.87	NA	NA
109	SGPI_109	7/20/16	DWDS_B	2016	site_B2	other_site_in_DWDS_B	Chlorine	No	Accuri	NA	NA	NA	29700.7821	1.01756925	0.778835575	3.37E-05	NA	NA	NA	NA	NA	NA	NA	NA	NA	NA	NA	NA	0.5	NA	NA
110	SGPI_110	7/20/16	DWDS_B	2016	site_B3	other_site_in_DWDS_B	Chlorine	No	Accuri	NA	NA	NA	1488.83024	1.15652869	0.460874108	0.000388958	NA	NA	NA	NA	NA	NA	NA	NA	NA	NA	NA	NA	0.9	NA	NA
111	SGPI_111	7/20/16	DWDS_B	2016	site_B4	other_site_in_DWDS_B	Chlorine	No	Accuri	NA	NA	NA	1780.07268	1.14149959	0.313259832	0.000216882	NA	NA	NA	NA	NA	NA	NA	NA	NA	NA	NA	NA	1.08	NA	NA
113	SGPI_113	7/20/16	DWDS_B	2016	site_B5	other_site_in_DWDS_B	Chlorine	No	Accuri	NA	NA	NA	2407.4786	1.14539471	0.350461033	0.000174758	NA	NA	NA	NA	NA	NA	NA	NA	NA	NA	NA	NA	0.88	NA	NA
115	SGPI_115	7/20/16	DWDS_B	2016	site_B6	other_site_in_DWDS_B	Chlorine	No	Accuri	NA	NA	NA	1148.80333	1.18375975	0.217886448	0.000228735	NA	NA	NA	NA	NA	NA	NA	NA	NA	NA	NA	NA	0.77	NA	NA
116	SGPI_116	7/20/16	DWDS_B	2016	site_B7	other_site_in_DWDS_B	Chlorine	No	Accuri	NA	NA	NA	19284.2805	1.02008579	0.771669711	5.13E-05	NA	NA	NA	NA	NA	NA	NA	NA	NA	NA	NA	NA	0.1	NA	NA
117	SGPI_117	7/20/16	DWDS_B	2016	site_B8	other_site_in_DWDS_B	Chlorine	No	Accuri	NA	NA	NA	2269.83416	1.1396866	0.05409436	2.72E-05	NA	NA	NA	NA	NA	NA	NA	NA	NA	NA	NA	NA	0.96	NA	NA
118	SGPI_118	7/20/16	DWDS_B	2016	site_B9	other_site_in_DWDS_B	Chlorine	No	Accuri	NA	NA	NA	1813.23989	1.10074067	0.555302926	0.000383332	NA	NA	NA	NA	NA	NA	NA	NA	NA	NA	NA	NA	0.85	NA	NA
119	SGPI_119	7/20/16	DWDS_B	2016	site_B10	other_site_in_DWDS_B	Chlorine	No	Accuri	NA	NA	NA	3742.38577	1.0863943	0.509434677	0.000165124	NA	NA	NA	NA	NA	NA	NA	NA	NA	NA	NA	NA	0.78	NA	NA
120	SGPI_120	7/27/16	DWDS_A	2016	site_A1	other_site_in_DWDS_A	Chlorine	No	Accuri	NA	exclude	NA	133883.487	1.05175889	0.903739428	9.54E-06	NA	NA	NA	NA	NA	NA	69.7	1	NA	8.34	NA	0.3	0.14	NA	NA
121	SGPI_121	7/27/16	DWDS_A	2016	site_A11	other_site_in_DWDS_A	Chlorine	No	Accuri	NA	exclude	NA	4323.30918	1.21487425	0.636391664	0.000204338	NA	NA	NA	NA	NA	NA	7.5	1	NA	8.66	26.1	0.62	0.49	NA	NA
122	SGPI_122	7/27/16	DWDS_A	2016	site_A2	other_site_in_DWDS_A	Chlorine	No	Accuri	NA	exclude	NA	6817.6296	1.13379954	0.645547628	0.000127736	NA	NA	NA	NA	NA	NA	11.1	1	NA	8.66	NA	1.18	1.02	NA	NA
123	SGPI_123	7/27/16	DWDS_A	2016	site_A4	other_site_in_DWDS_A	Chlorine	No	Accuri	NA	exclude	NA	52901.8039	1.0079239	0.849986118	2.17E-05	NA	NA	NA	NA	NA	NA	2	1	NA	8.68	NA	0.64	0.41	NA	NA
124	SGPI_124	7/27/16	DWDS_A	2016	site_A3	other_site_in_DWDS_A	Chlorine	No	Accuri	NA	exclude	NA	58880.7808	1.06780268	0.995089444	2.67E-05	NA	NA	NA	NA	NA	NA	5.3	1	NA	8.65	NA	0.64	0.53	NA	NA
125	SGPI_125	7/27/16	DWDS_A	2016	site_A5	other_site_in_DWDS_A	Chlorine	No	Accuri	NA	exclude	BDL	22243.9794	1.00921449	0.897327371	5.54E-05	NA	NA	NA	NA	NA	NA	0.5	1	BDL	8.74	NA	0.65	0.5	NA	NA
126	SGPI_126	7/27/16	DWDS_A	2016	site_A8	other_site_in_DWDS_A	Chlorine	No	Accuri	NA	exclude	NA	83248.7969	1.04305195	0.880043924	1.45E-05	NA	NA	NA	NA	NA	NA	2	1	NA	8.69	NA	0.41	0.3	NA	NA
127	SGPI_127	7/27/16	DWDS_A	2016	site_A10	other_site_in_DWDS_A	Chlorine	No	Accuri	NA	exclude	BDL	68438.0754	1.03093735	0.915609552	1.87E-05	NA	NA	NA	NA	NA	NA	0.5	1	BDL	8.61	25.6	0.39	0.2	NA	NA
128	SGPI_128	7/27/16	DWDS_A	2016	site_A6	other_site_in_DWDS_A	Chlorine	No	Accuri	NA	exclude	NA	157782.701	1.03798987	0.995634729	9.17E-06	NA	NA	NA	NA	NA	NA	1	1	NA	8.61	NA	0.29	0.16	NA	NA
129	SGPI_129	7/27/16	DWDS_A	2016	site_A7	other_site_in_DWDS_A	Chlorine	No	Accuri	NA	exclude	NA	13866.4507	1.07234166	0.756962793	7.24E-05	NA	NA	NA	NA	NA	NA	3.1	1	NA	8.72	NA	0.24	0.1	NA	NA
130	SGPI_130	7/27/16	DWDS_A	2016	site_A9	other_site_in_DWDS_A	Chlorine	No	Accuri	NA	NA	NA	3320.20864	1.06837763	0.480047138	0.000173201	NA	NA	NA	NA	NA	NA	NA	NA	NA	8.6	NA	0.98	0.83	NA	NA
131	SGPI_131	8/22/17	DWDS_F	2017	site_11	other_site_in_DWDS_F	Chloramine	No	Accuri	NA	NA	NA	2326.73918	1.039756	0.258977339	0.000119425	0.000196008	1.619255075	0.002848919	1.165327614	0.002652912	1.124276902	17.30433472	1.201257829	NA	8.07	25.1	1.57	0.1	52.5	NA
132	SGPI_132	8/22/17	DWDS_F	2017	site_8	other_site_in_DWDS_F	Chloramine	No	Accuri	NA	NA	ADL	5152.17176	1.04980476	0.274712365	5.80E-05	0.002160583	1.785085082	0.005915633	1.424821682	0.00375505	1.075365949	2694.22624	1.164139938	ADL	8.02	25.2	1.13	0.1	34.97	NA
133	SGPI_133	8/22/17	DWDS_F	2017	site_14	other_site_in_DWDS_F	Chloramine	No	Accuri	NA	NA	BDL	3487.99811	1.0449782	0.016119934	4.83E-06	1.00E-05	1	0.014576327	1.132285502	0.015658624	1.05252732	0.5	1	BDL	8.11	27.3	2.7	0.13	12.36	12.36
134	SGPI_134	8/22/17	DWDS_F	2017	site_12	other_site_in_DWDS_F	Chloramine	No	Accuri	NA	NA	NA	1520.7988	2.07040317	0.22390964	0.000306935	0.000613214	1.724741202	0.002501055	1.352619323	0.001887841	1.070118303	6.773477689	1.133271864	NA	8.02	25.2	1.78	0.11	56.88	NA
135	SGPI_135	8/22/17	DWDS_F	2017	site_15	site_15	Chloramine	No	Accuri	NA	NA	BDL	1171.37206	1.18142654	0.003946477	3.98E-06	0.002111866	1.565355089	0.022169815	1.091889791	0.020057949	1.121656471	0.5	1	BDL	8.14	24.8	2.9	0.15	9.43	9.43
136	SGPI_136	8/22/17	DWDS_F	2017	site_13	other_site_in_DWDS_F	Chloramine	No	Accuri	NA	NA	NA	40336.3015	1.02448497	0.489422521	1.39E-05	0.009485242	1.523521948	0.013007627	1.070917976	0.003522385	1.083629925	24.71639132	1.302801551	NA	8.01	25.8	1.14	0.07	64.36	NA
137	SGPI_137	8/22/17	DWDS_F	2017	site_6	other_site_in_DWDS_F	Chloramine	No	Accuri	NA	NA	BDL	1022.74018	1.30016051	0.088892014	0.000113273	0.00060656	1.765369481	0.003750699	1.375592025	0.003144139	1.106470057	0.5	1	BDL	8.09	24.9	1.79	0.11	34.06	NA
138	SGPI_138	8/22/17	DWDS_F	2017	site_1	other_site_in_DWDS_F	Chloramine	No	Accuri	NA	NA	NA	1628.84707	1.10438351	0.195402521	0.000134602	0.000235144	1.744790485	0.001766521	1.341022448	0.001531377	1.116222483	163.5120179	1.653122977	NA	8.05	24.2	1.7	0.1	19.35	NA
139	SGPI_139	8/22/17	DWDS_F	2017	site_7	other_site_in_DWDS_F	Chloramine	No	Accuri	NA	NA	ADL	64474.9378	1.06144713	0.460571323	8.29E-06	0.005244449	1.692262925	0.01204449	1.070188317	0.006800041	1.310896935	2999.9	1	ADL	7.91	26	0.16	0	34.69	NA
140	SGPI_140	8/22/17	DWDS_F	2017	site_16	other_site_in_DWDS_F	Chloramine	No	Accuri	NA	NA	NA	1524.95	1.11614002	0.006026714	4.41E-06	0.002200135	1.540848173	0.015987131	1.042425632	0.013786996	1.134707845	1	1	NA	8.08	28.8	2.5	0.13	11.67	11.67
141	SGPI_141	8/23/17	DWDS_F	2017	site_2	other_site_in_DWDS_F	Chloramine	No	Accuri	NA	NA	NA	1273.26552	1.12051761	0.196184096	0.000175375	1.00E-05	1	0.000493739	1.066667249	0.000530756	1.027684355	5.037057996	2.453623378	NA	8.09	25.3	2.5	0.11	20.87	NA
142	SGPI_142	8/23/17	DWDS_F	2017	site_22	other_site_in_DWDS_F	Chloramine	No	Accuri	NA	NA	NA	133449.75	1.00708777	0.917434293	9.45E-06	0.02792876	1.431084322	0.029671023	1.019695803	0.001742263	1.004102986	254.3949447	1.50815988	NA	7.8	26.8	0.16	0	206.3	NA
143	SGPI_143	8/23/17	DWDS_F	2017	site_21	other_site_in_DWDS_F	Chloramine	No	Accuri	NA	NA	NA	110996.986	1.01765877	0.83013825	9.93E-06	0.028519239	1.440303447	0.031165794	1.011463246	0.002646555	1.02538584	1052.989082	1.188493719	NA	7.67	26.2	0.43	0	192.61	NA
144	SGPI_144	8/23/17	DWDS_F	2017	site_20	other_site_in_DWDS_F	Chloramine	No	Accuri	NA	NA	NA	9821.74215	1.01153258	0.676643212	8.50E-05	0.001540281	1.502542416	0.002340314	1.053899324	0.000800034	1.070948145	138.6295621	3.727430629	NA	7.78	27.7	1.25	0.05	163.92	NA
145	SGPI_145	8/23/17	DWDS_F	2017	site_3	other_site_in_DWDS_F	Chloramine	No	Accuri	NA	NA	NA	1055.8457	1.17852079	0.211419864	0.000240452	0.028446034	1.429840566	0.029891223	1.00991547	0.001445189	1.012183178	3.419951893	1.612544805	NA	8.03	23.8	1.88	0.1	23.31	NA
146	SGPI_146	8/23/17	DWDS_F	2017	site_19	other_site_in_DWDS_F	Chloramine	No	Accuri	NA	NA	NA	20768.2116	1.01116122	0.652315372	3.80E-05	0.006075906	1.50152015	0.007216506	1.044186789	0.001140601	1.078998013	30.14753548	1.270293583	NA	7.97	25.5	1.63	0.07	131.08	NA
147	SGPI_147	8/23/17	DWDS_F	2017	site_5	other_site_in_DWDS_F	Chloramine	No	Accuri	NA	NA	NA	109414.26	1.0082768	0.806537653	9.58E-06	0.028446034	1.429840566	0.029891223	1.00991547	0.001445189	1.012183178	2419.699	1	NA	7.79	27	0.4	0.02	28.98	NA
148	SGPI_148	8/23/17	DWDS_F	2017	site_18	other_site_in_DWDS_F	Chloramine	No	Accuri	NA	NA	NA	3302.21334	1.10974147	0.610818395	0.000236524	0.000135391	1.453145848	0.000765117	1.034745666	0.000629726	1.020261861	2.016529675	2.024918588	NA	8.06	25.5	1.7	0.09	78.9	NA
149	SGPI_149	8/23/17	DWDS_F	2017	site_23	other_site_in_DWDS_F	Chloramine	No	Accuri	NA	NA	NA	104997.027	1.03362733	0.828059689	1.05E-05	0.025076144	1.491653197	0.02753228	1.008293263	0.002456137	1.099260641	484.7800365	2.46208177	NA	7.69	26.6	0.36	0	234.39	NA
150	SGPI_150	8/23/17	DWDS_F	2017	site_24	site_24	Chloramine	No	Accuri	NA	NA	NA	52473.9825	1.02428404	0.756979168	1.84E-05	0.008205835	1.528768881	0.010090819	1.031831524	0.001884985	1.1280328	309.1601502	1.40496546	NA	7.75	26.2	0.39	0	289.38	NA
151	SGPI_151	10/23/17	DWDS_F	2017	site_ut	site_ut	Chloramine	No	Accuri	NA	NA	NA	152588.939	1.05256051	0.608509679	4.91E-06	NA	NA	NA	NA	NA	NA	NA	NA	NA	NA	NA	NA	NA	24	NA
152	SGPI_152	11/2/17	DWDS_F	2017	site_ut	site_ut	Chloramine	No	Accuri	NA	NA	NA	8113.36208	1.04444987	0.323325233	4.36E-05	3.97E-05	1.438982727	0.000470429	1.007037654	0.0004307	1.027884454	NA	NA	NA	NA	NA	2.05	0.05	24	NA
153	SGPI_153	11/6/17	DWDS_F	2017	site_ut	site_ut	Chloramine	No	Accuri	NA	NA	NA	6300.23885	1.09627087	0.289936638	5.23E-05	0.000166846	1.459146262	0.000337591	1.029606516	0.000170745	1.03393338	NA	NA	NA	NA	NA	2.12	0.12	24	NA
154	SGPI_154	11/13/17	DWDS_F	2017	site_ut	site_ut	Chloramine	No	Accuri	NA	NA	NA	27201.7507	1.00332179	0.449464626	1.82E-05	0.000315202	1.449838554	0.000899866	1.012232818	0.000584664	1.03798678	NA	NA	NA	NA	NA	1.3	0.04	24	NA
155	SGPI_155	11/16/17	DWDS_F	2017	site_ut	site_ut	Chloramine	No	Accuri	NA	NA	NA	31384.4181	1.09929169	0.255481183	9.29E-06	NA	NA	NA	NA	NA	NA	NA	NA	NA	NA	NA	NA	NA	24	NA
156	SGPI_156	11/20/17	DWDS_F	2017	site_ut	site_ut	Chloramine	No	Accuri	NA	NA	NA	131059.08	1.07795468	0.487333985	4.40E-06	0.00264357	1.464019806	0.003418006	1.037047606	0.000774436	1.033385821	NA	NA	NA	NA	NA	2.3	NA	24	NA
157	SGPI_157	11/27/17	DWDS_F	2017	site_ut	site_ut	Chloramine	No	Accuri	NA	NA	NA	111386.492	1.00140439	0.327292506	3.10E-06	0.001590294	1.443620562	0.002606746	1.030122003	0.001016452	1.011379744	NA	NA	NA	NA	NA	0	0	24	NA
158	SGPI_158	12/4/17	DWDS_F	2017	site_ut	site_ut	Chloramine	No	Accuri	NA	NA	NA	3760.50444	1.07185986	0.163835243	4.73E-05	1.00E-05	1	0.000558923	1.020480971	0.000554793	1.016743753	NA	NA	NA	NA	NA	0.71	0.17	24	NA
159	SGPI_159	12/7/17	DWDS_F	2017	site_ut	site_ut	Chloramine	No	Accuri	NA	NA	NA	48583.5001	1.01787514	0.078039649	1.64E-06	0.001559646	1.477293725	0.002705665	1.041473672	0.001146018	1.047725795	NA	NA	NA	NA	NA	NA	NA	24	NA
160	SGPI_160	12/11/17	DWDS_F	2017	site_ut	site_ut	Chloramine	No	Accuri	NA	NA	NA	4344.70777	1.02830743	0.459882882	0.000121472	0.000931613	1.535269962	0.002856205	1.062264423	0.001924593	1.108444023	3.224903099	1.965307305	NA	NA	NA	2.5	0.03	24	NA
161	SGPI_161	12/14/17	DWDS_F	2017	site_ut	site_ut	Chloramine	No	Accuri	NA	NA	NA	2267.57393	1.0779665	0.094827583	4.53E-05	NA	NA	NA	NA	NA	NA	NA	NA	NA	NA	NA	2.5	0.12	24	NA
162	SGPI_162	12/18/17	DWDS_F	2017	site_ut	site_ut	Chloramine	No	Accuri	NA	NA	NA	3258.5136	1.11538383	0.144131469	4.98E-05	5.09E-05	1.497610247	0.000327062	1.111415456	0.00027616	1.00378889	NA	NA	NA	NA	NA	2.3	0.05	24	NA
163	SGPI_163	12/29/17	DWDS_F	2017	site_ut	site_ut	Chloramine	No	Accuri	NA	NA	NA	1594.65924	1.25807125	0.331601544	0.000271836	NA	NA	NA	NA	NA	NA	NA	NA	NA	NA	NA	2.6	0.05	24	NA
164	SGPI_164	1/1/18	DWDS_F	2018	site_ut	site_ut	Chloramine	No	Accuri	NA	NA	NA	1313.49361	1.26226878	0.407847416	0.000413512	1.00E-05	1	0.001479745	1.015435025	0.001556297	1.010346821	1	1	NA	NA	NA	2.4	0.05	24	NA
165	SGPI_165	1/5/18	DWDS_F	2018	site_ut	site_ut	Chloramine	No	Accuri	NA	NA	NA	490.978338	1.24866199	0.191875636	0.000494978	NA	NA	NA	NA	NA	NA	38.23087757	1.200333732	NA	NA	NA	2.7	0.06	24	NA
166	SGPI_166	1/8/18	DWDS_F	2018	site_ut	site_ut	Chloramine	No	Accuri	NA	NA	NA	2274.46172	1.17821249	0.424254346	0.000250763	9.82E-05	1.475191483	0.000520981	1.049287893	0.000422776	1.036911196	1	1	NA	8.1	18.3	1.5	0	24	NA
167	SGPI_167	1/12/18	DWDS_F	2018	site_ut	site_ut	Chloramine	No	Accuri	NA	NA	NA	519.698797	1.40464086	0.152794881	0.00041578	NA	NA	NA	NA	NA	NA	NA	NA	NA	7.94	17.7	1.4	0.05	24	NA
168	SGPI_168	1/15/18	DWDS_F	2018	site_ut	site_ut	Chloramine	No	Accuri	NA	NA	NA	5706.45998	1.08460307	0.704243797	0.000161091	0.000259613	1.500782127	0.000774731	1.072584684	0.000515118	1.049718576	89.70457068	1.271317352	NA	7.96	16.6	1.8	0	24	NA
169	SGPI_169	1/29/18	DWDS_F	2018	site_ut	site_ut	Chloramine	No	Accuri	NA	NA	NA	2005.2606	1.07657678	0.477361235	0.000280495	5.87E-05	1.458654706	0.000567637	1.030447153	0.000508889	1.032401189	NA	NA	NA	8.11	15.2	2.2	0.26	24	NA
170	SGPI_170	1/31/18	DWDS_F	2018	site_ut	site_ut	Chloramine	No	Accuri	NA	NA	NA	1441.43556	1.14031921	0.537085482	0.000481094	NA	NA	NA	NA	NA	NA	NA	NA	NA	NA	NA	NA	NA	24	NA
171	SGPI_171	2/4/18	DWDS_F	2018	site_ut	site_ut	Chloramine	No	Accuri	NA	NA	NA	3985.64106	1.03403484	0.348967449	9.58E-05	NA	NA	NA	NA	NA	NA	NA	NA	NA	NA	NA	NA	NA	24	NA
172	SGPI_172	2/7/18	DWDS_F	2018	site_2	other_site_in_DWDS_F	Chloramine	No	Accuri	NA	NA	NA	1473.93325	1.19944209	0.401851672	0.000349004	1.00E-05	1	0.000321433	1.140610487	0.000353548	1.175731143	30.46965704	1.585014629	NA	7.9	16	2.6	0	20.87	NA
173	SGPI_173	2/7/18	DWDS_F	2018	site_22	other_site_in_DWDS_F	Chloramine	No	Accuri	NA	NA	BDL	490.668207	1.24457552	0.18046573	0.00046397	1.00E-05	1	0.00024846	1.052904823	0.000277773	1.098820255	0.5	1	BDL	8	17.6	2.4	0	206.3	NA
174	SGPI_174	2/7/18	DWDS_F	2018	site_21	other_site_in_DWDS_F	Chloramine	No	Accuri	NA	NA	BDL	737.852224	1.02788492	0.159296562	0.000224704	1.00E-05	1	0.000460222	1.365690395	0.000620352	1.02227222	0.5	1	BDL	8	17.3	2.2	0	192.61	NA
175	SGPI_175	2/7/18	DWDS_F	2018	site_20	other_site_in_DWDS_F	Chloramine	No	Accuri	NA	NA	BDL	410.529239	1.27577843	0.306403182	0.000982725	1.00E-05	1	0.000342021	1.145246524	0.000351025	1.086721069	0.5	1	BDL	8.03	19.1	2.4	0	163.92	NA
176	SGPI_176	2/7/18	DWDS_F	2018	site_3	other_site_in_DWDS_F	Chloramine	No	Accuri	NA	NA	NA	915.757379	1.0678242	0.241602033	0.000289531	1.00E-05	1	0.000520456	1.235574405	0.000549465	1.018089763	1.760681686	2.225590125	NA	7.86	18.1	2.4	0	23.31	NA
177	SGPI_177	2/7/18	DWDS_F	2018	site_19	other_site_in_DWDS_F	Chloramine	No	Accuri	NA	NA	NA	323.35288	1.16688904	0.273212545	0.001020579	1.00E-05	1	0.000337869	1.101817288	0.000397579	1.17120989	11.14046678	2.23927135	NA	7.91	16.7	2.5	0	131.08	NA
178	SGPI_178	2/7/18	DWDS_F	2018	site_5	other_site_in_DWDS_F	Chloramine	No	Accuri	NA	NA	NA	772.935695	1.5713757	0.353585283	0.000738339	2.79E-05	1.720341188	0.000409019	1.280599703	0.000381114	1.148755067	1416.877595	2.131469545	NA	7.89	17.8	2.2	0	28.98	NA
179	SGPI_179	2/7/18	DWDS_F	2018	site_18	other_site_in_DWDS_F	Chloramine	No	Accuri	NA	NA	BDL	118.352939	1.18362468	0.223308579	0.002348875	9.55E-05	1.953951898	0.000355491	1.659587003	0.000260025	1.031357843	0.5	1	BDL	7.94	18.9	2.6	0	78.9	NA
180	SGPI_180	2/7/18	DWDS_F	2018	site_23	other_site_in_DWDS_F	Chloramine	No	Accuri	NA	NA	BDL	904.647251	1.16732223	0.142866241	0.000185791	1.00E-05	1	0.000618412	1.076161001	0.000751709	1.070410754	0.5	1	BDL	8.01	16.9	2.1	0	234.39	NA
181	SGPI_181	2/7/18	DWDS_F	2018	site_24	site_24	Chloramine	No	Accuri	NA	NA	NA	1067.13649	1.12170589	0.177776458	0.000189531	7.02E-05	1.518585388	0.000354213	1.119492846	0.000284018	1.026078628	3.224903099	1.965307305	NA	7.98	18.3	2	0	289.38	NA
182	SGPI_182	8/1/18	DWDS_B	2018	site_B1	other_site_in_DWDS_B	Chlorine	No	Accuri	NA	NA	NA	500.015962	1.49663907	0.342266656	0.001056124	0.000111591	1.439076966	0.003079871	1.02857184	0.00296828	1.006470309	7.823042886	1.45529821	NA	8.16	23	0.92	0.8	NA	NA
183	SGPI_183	8/1/18	DWDS_B	2018	site_B2	other_site_in_DWDS_B	Chlorine	No	Accuri	NA	NA	NA	93824.0859	1.02118965	0.800785937	1.12E-05	0.012610512	1.465016885	0.01470909	1.003885756	0.002098577	1.066999466	3.388214869	1.309529072	NA	8.11	24	0.36	0.23	NA	NA
184	SGPI_184	8/1/18	DWDS_B	2018	site_B3	other_site_in_DWDS_B	Chlorine	No	Accuri	NA	NA	NA	7165.44162	1.07828816	0.575414946	9.98E-05	0.001468006	1.443115252	0.003968273	1.026034284	0.002500268	1.014808	2.449489743	1.33203404	NA	8.17	23	0.72	0.64	NA	NA
185	SGPI_185	8/1/18	DWDS_B	2018	site_B4	other_site_in_DWDS_B	Chlorine	No	Accuri	NA	NA	BDL	292.857301	1.66903034	0.245543506	0.00142282	0.000217819	1.447827237	0.005676307	1.005392437	0.005458488	1.041820405	0.5	1	BDL	7.99	21	1.2	1.03	NA	NA
186	SGPI_186	8/1/18	DWDS_B	2018	site_B5	other_site_in_DWDS_B	Chlorine	No	Accuri	NA	NA	NA	734.437889	1.31815807	0.421355067	0.000803849	0.000201166	1.454990625	0.003821767	1.013979042	0.003620601	1.043476986	2.024845673	2.712087022	NA	8.13	22	0.95	1	NA	NA
187	SGPI_187	8/1/18	DWDS_B	2018	site_B6	other_site_in_DWDS_B	Chlorine	No	Accuri	NA	NA	NA	965.420036	1.03205383	0.52640483	0.000642578	1.00E-05	1	0.003129411	1.032833584	0.003166884	1.112991072	1	1	NA	8.25	23	0.9	0.68	NA	NA
188	SGPI_188	8/1/18	DWDS_B	2018	site_B7	other_site_in_DWDS_B	Chlorine	No	Accuri	NA	NA	NA	16059.8346	1.01447968	0.616891352	4.60E-05	0.007705888	1.479720422	0.009095952	1.016844816	0.001390064	1.074987975	94.1856677	1.642959923	NA	7.77	21	0.55	0.35	NA	NA
189	SGPI_189	8/1/18	DWDS_B	2018	site_B8	other_site_in_DWDS_B	Chlorine	No	Accuri	NA	NA	NA	509.351852	2.48102718	0.158529434	0.00077395	0.00010182	1.462703359	0.006390533	1.057365673	0.006288713	1.010682418	2	1	NA	8.19	20	1.22	1.09	NA	NA
190	SGPI_190	8/1/18	DWDS_B	2018	site_B9	other_site_in_DWDS_B	Chlorine	No	Accuri	NA	NA	NA	390.290737	1.53637111	0.306238315	0.001234174	0.000225848	1.47909583	0.003902242	1.071391578	0.003676394	1.019727689	2.024845673	2.712087022	NA	8.13	22	0.95	0.47	NA	NA
191	SGPI_191	8/1/18	DWDS_B	2018	site_B10	other_site_in_DWDS_B	Chlorine	No	Accuri	NA	NA	NA	5464.93194	1.21028397	0.610770215	0.000152252	0.001513981	1.563548455	0.004128144	1.190524195	0.002614163	1.013575804	229.808616	1.256004955	NA	8.13	24	0.85	0.62	NA	NA
192	SGPI_192	8/8/18	DWDS_A	2018	site_A1	other_site_in_DWDS_A	Chlorine	No	Accuri	NA	NA	NA	14763.4189	1.02193185	0.936240353	8.88E-05	0.001837574	1.4309215	0.007067473	1.01552791	0.005229899	1.008087002	5.433231083	1.489093615	NA	8.28	22	0.7	0.57	NA	NA
193	SGPI_193	8/8/18	DWDS_A	2018	site_A11	other_site_in_DWDS_A	Chlorine	No	Accuri	NA	NA	NA	3875.12343	1.23647052	0.475952177	0.000164019	0.002501577	1.614308185	0.010751044	1.12146113	0.008249468	1.161170035	3.54964787	2.250913323	NA	8.37	25	0.8	0.62	NA	NA
194	SGPI_194	8/8/18	DWDS_A	2018	site_A2	other_site_in_DWDS_A	Chlorine	No	Accuri	NA	NA	NA	3002.55763	1.03304329	0.460835539	0.000179167	1.00E-05	1	0.012851315	1.02706451	0.013133412	1.009400942	3.049590136	1.023456789	NA	8.28	21.6	1.18	1.03	NA	NA
195	SGPI_195	8/8/18	DWDS_A	2018	site_A4	other_site_in_DWDS_A	Chlorine	No	Accuri	NA	NA	NA	16780.8301	1.06280424	0.710452116	5.50E-05	0.002163483	1.474115429	0.010824668	1.035205993	0.008661185	1.049459313	1	1	NA	8.36	23.7	0.67	0.52	NA	NA
196	SGPI_196	8/8/18	DWDS_A	2018	site_A3	other_site_in_DWDS_A	Chlorine	No	Accuri	NA	NA	BDL	36351.9903	1.03317146	0.8779301	3.29E-05	0.00370383	1.441326513	0.015155057	1.027244218	0.011451227	1.011034833	0.5	1	BDL	8.26	23.8	0.77	0.64	NA	NA
197	SGPI_197	8/8/18	DWDS_A	2018	site_A5	other_site_in_DWDS_A	Chlorine	No	Accuri	NA	NA	BDL	10559.1175	1.07105483	0.810636742	0.000103917	0.001527416	1.461562195	0.011265361	1.035614094	0.009737945	1.03134257	0.5	1	BDL	8.09	22.9	0.89	0.73	NA	NA
198	SGPI_198	8/8/18	DWDS_A	2018	site_A8	other_site_in_DWDS_A	Chlorine	No	Accuri	NA	NA	NA	10542.632	1.25500075	0.703639977	9.71E-05	0.000685785	1.486205356	0.005901907	1.021255527	0.005216123	1.079742334	1	1	NA	8.3	22.9	0.73	0.64	NA	NA
199	SGPI_199	8/8/18	DWDS_A	2018	site_A10	other_site_in_DWDS_A	Chlorine	No	Accuri	NA	NA	BDL	14155.7333	1.0640695	0.68394865	6.13E-05	0.003203049	1.446489629	0.008249141	1.03019954	0.005046091	1.015392118	0.5	1	BDL	8.32	24.2	0.65	0.51	NA	NA
200	SGPI_200	8/8/18	DWDS_A	2018	site_A6	other_site_in_DWDS_A	Chlorine	No	Accuri	NA	NA	NA	86152.1525	1.03393328	0.910354138	1.47E-05	0.009303907	1.524615626	0.01541837	1.045192788	0.006114463	1.109966145	1.760681686	2.225590125	NA	8.24	20.9	0.51	0.37	NA	NA
201	SGPI_201	8/8/18	DWDS_A	2018	site_A7	other_site_in_DWDS_A	Chlorine	No	Accuri	NA	NA	NA	18281.7799	1.00540009	0.87750492	6.46E-05	0.004781616	1.508598204	0.008862024	1.083020133	0.004080409	1.050207566	4.01497198	1.441602856	NA	8.44	25.6	0.39	0.26	NA	NA
202	SGPI_202	8/8/18	DWDS_A	2018	site_A9	other_site_in_DWDS_A	Chlorine	No	Accuri	NA	NA	NA	22059.4883	1.04311757	0.887257949	5.57E-05	0.003370977	1.451510428	0.013722566	1.035554833	0.010351589	1.017108013	4.617358552	1.183006686	NA	8.24	22.7	0.86	0.73	NA	NA
203	SGPI_203	2/1/18	DWDS_F	2018	site_ut	site_ut	chloramine	No	Accuri	NA	NA	NA	NA	NA	NA	NA	0.000110927	1.514886259	0.000976888	1.078968526	0.000865962	1.063347215	NA	NA	NA	8.25	15.3	2.5	0.05	24	NA
204	SGPI_204	2/5/18	DWDS_F	2018	site_ut	site_ut	chloramine	No	Accuri	NA	NA	NA	NA	NA	NA	NA	1.00E-05	1	0.001416235	1.180441746	0.002017192	1.022727795	NA	NA	NA	8.19	15	2.6	0.07	24	NA
